1 ***Leishmania* infection induces a limited differential gene expression in the sand**  
2 **fly midgut**

3

4 Iliano V. Coutinho-Abreu<sup>a\*</sup>, Tiago D. Serafim<sup>a</sup>, Claudio Meneses<sup>a</sup>, Shaden  
5 Kamhawi<sup>a</sup>, Fabiano Oliveira<sup>a\*</sup> and Jesus G. Valenzuela<sup>a\*</sup>

6 <sup>a</sup>Vector Molecular Biology Section, Laboratory of Malaria and Vector Research,  
7 National Institute of Allergy and Infectious Diseases, National Institutes of Health,  
8 Rockville, MD, USA

9 \*Correspondence: [jvalenzuela@niaid.nih.gov](mailto:jvalenzuela@niaid.nih.gov); [loliveira@niaid.nih.gov](mailto:loliveira@niaid.nih.gov);  
10 [iliano.vieiracoutinhoabreugomes2@nih.gov](mailto:iliano.vieiracoutinhoabreugomes2@nih.gov)

11

12

13 Running Head: Transcriptome of sand fly midguts infected with *Leishmania*

14

15

16

17

18

19

20

21

## 22 **Abstract**

23 Background: Phlebotomine sand flies are the vectors of *Leishmania* worldwide. To develop in  
24 the sand fly midgut, *Leishmania* multiplies and undergoes multiple stage differentiations leading  
25 to the infective form, the metacyclic promastigotes. To gain a better understanding of the  
26 influence of *Leishmania* infection in midgut gene expression, we performed RNA-Seq  
27 comparing uninfected *Lutzomyia longipalpis* midguts and *Leishmania infantum*-infected  
28 *Lutzomyia longipalpis* midguts at seven time points which cover the various developmental  
29 *Leishmania* stages including early time points when blood digestion is taking place and late time  
30 points when the parasites are undergoing metacyclogenesis.

31 Results: Out of over 13,841 transcripts assembled *de novo*, only 113 sand fly transcripts, about  
32 1%, were differentially expressed. Further, we observed a low overlap of differentially expressed  
33 sand fly transcripts across different time points suggesting a specific influence of each  
34 *Leishmania* stage on midgut gene expression. Two main patterns of sand fly gene expression  
35 modulation were noticed. At early time points (days 1-4), more transcripts were down-regulated  
36 by *Leishmania* infection at large fold changes ( $> -32$  fold). Among the down-regulated genes, the  
37 transcription factor Forkhead/HNF-3 and hormone degradation enzymes were differentially  
38 regulated on day 4 and appear to be the upstream regulators of nutrient transport, digestive  
39 enzymes, and peritrophic matrix proteins. Conversely, at later time points (days 6 onwards),  
40 most of the differentially expressed transcripts were up-regulated by small fold changes ( $< 32$   
41 fold), and the molecular function of such genes are associated with the metabolism of lipids and  
42 detoxification of xenobiotics (P450).

43 Conclusion: Overall, it appears that *Leishmania* modulates sand fly gene expression early on in  
44 order to overcome the barriers imposed by the midgut, yet it behaves like a commensal at later  
45 time points, when modest midgut gene expression changes correlate with a massive amount of  
46 parasites in the anterior midgut.

47 **Keywords:** Sand fly, midgut, RNA-Seq, transcriptomics, *Lutzomyia longipalpis*, *Leishmania*  
48 *infantum*.

49

## 50 **Background**

51 *Leishmania* is a digenetic parasite developing in the mammalian host as well as in the  
52 insect vector. These parasites are mostly transmitted by phlebotomine sand flies (Diptera:  
53 Psychodidae) of the genera *Phlebotomus* and *Lutzomyia* in the Old and New World, respectively  
54 [1].

55 *Leishmania* fully develops in the lumen of the sand fly midgut [2-4]. Once a sand fly  
56 takes up an infected blood meal, *Leishmania* is carried along within macrophages in the round-  
57 shaped amastigote form (mammalian stage). Between 18h and 24h post blood meal, these  
58 parasites are released from the macrophages and start to differentiate into procyclic  
59 promastigotes within blood enveloped by the peritrophic matrix [5]. During this process, the  
60 parasites elongate their cell bodies and expose their flagella, becoming fully differentiated into  
61 procyclics by day 2 (48h). Between days 2 and 4, *Leishmania* multiplies and undergoes another  
62 differentiation step, acquiring an elongated (banana-like shape) form termed nectomonads [2-4].  
63 Upon the breakdown of the peritrophic matrix, the nectomonads escape to the ectoperitrophic  
64 space and eventually dock on the midgut microvilli [6, 7]. As the remains of the digested blood  
65 are evacuated, the parasites detach from the epithelium and further differentiate into the

66 leptomonad stage, which exhibit a smaller cell body and a longer flagellum than nectomonads  
67 [2-4]. From day 6 onwards, the leptomonads undergo a differentiation process, termed  
68 metacyclogenesis, giving rise to the infective forms, the metacyclic promastigotes [8]. During  
69 metacyclogenesis, the parasites replace their glycocalyx, exhibiting different sugar side chains on  
70 their major surface glycans, reduce the size of their cell bodies, and elongate their flagella [2-4].  
71 All these transformations give rise to highly motile parasites [2-4].

72         Even when developing in their natural sand fly vectors, *Leishmania* faces barriers  
73 imposed by the midgut; overtaking such barriers is critical for the development of mature  
74 *Leishmania* infections. During the transitional stages between amastigotes and procyclic  
75 promastigotes, the parasites are susceptible to the harmful action of digestive enzymes [9]. The  
76 immune system may also counteract infection with the parasites, by activation of the Imd  
77 pathway [10, 11]. Escaping from the peritrophic matrix is also a crucial step for *Leishmania*  
78 survival [12, 13]. Another critical barrier is the attachment to the midgut epithelium [14]. For this  
79 step, specific carbohydrate side chains are required for binding to a midgut epithelium receptor  
80 [7, 15, 16]. From there on, undefined parameters trigger the metacyclogenesis process in  
81 parasites leading to the development of a mature infection.

82         The midgut transcriptomes of three sand fly species have been described, focusing mostly  
83 on differences in gene expression triggered by blood intake and parasite infection as compared to  
84 sugar fed midguts [18-20]. Nonetheless, such studies took place before the advent of deep  
85 sequencing, being limited to the investigation of about 1,000 transcripts due to the low dynamic  
86 range of cDNA libraries. Despite such a limited pool of genes, these studies unveiled multiple  
87 genes differentially regulated by blood and/or *Leishmania* infection. For the later, genes

88 encoding digestive enzymes and components of the peritrophic matrix, the main midgut barriers  
89 to *Leishmania* development, were differentially regulated [18-20].

90 In order to investigate the effects of *Leishmania* infection on sand fly midgut gene  
91 expression, we carried out an RNA-Seq analysis of *Leishmania infantum*-infected *Lutzomyia*  
92 *longipalpis* midguts at 7 timepoints, each corresponding to when the insect midguts are enriched  
93 with a particular *Leishmania* stage. These encompassed early time points when blood digestion is  
94 taking place as well as late time points when the parasites are undergoing metacyclogenesis. This  
95 approach expands our breadth of knowledge by assessing the effects of *Leishmania* infection on  
96 over 13,000 sand fly midgut transcripts, focusing on genes encoding secreted proteins and also  
97 on genes participating in biological processes.

98

## 99 **Results**

### 100 **Sand fly infection and *Leishmania* differentiation**

101 In order to assess how gene expression in sand fly midguts is affected by *Leishmania*  
102 growth and differentiation, *Le. infantum* infected-*Lutzomyia longipalpis* midguts (1d through 14d  
103 Pi) were dissected for RNA-Seq library construction in triplicate and compared to midguts fed on  
104 uninfected blood at the same time points (1d through 14d PBM). All the libraries gave rise to  
105 high quality data and robust expression levels, except one replicate of the 2d PBM and another of  
106 the 12d PBM time points, which were excluded from further analyses. For infected midguts, *Le.*  
107 *infantum* growth in the *Lu. longipalpis* sand fly midgut followed a typical and expected pattern  
108 whereby low levels of parasites were detected early at 4d (median = 3,000 parasites) and 6d  
109 (median = 6,000 parasites). From 6d to 14d, the parasite load increased 21-fold, reaching about  
110 126,000 parasites at 14d. During the late time points, parasites underwent differentiation through.

111 metacyclogenesis, increasing the proportion of metacyclic stage parasites from 0% on 6d to 92%  
112 on 14d [21].

113

#### 114 **Expanding the *Lu. longipalpis* midgut repertoire of putative proteins**

115       A *Lu. longipalpis* midgut-specific *de novo* assembly was made from libraries prepared  
116 from RNA extracted from uninfected midguts at each of the seven study timepoints (total of  
117 53,683,499 high quality reads). High quality reads were assembled in 57,016 contigs that were  
118 further down-selected to 13,841 putative contigs based on the presence of an ORF and  
119 similarities to proteins deposited at Refseq invertebrate, NCBI Genbank or SwissProt. Putative  
120 proteins where a signal peptide was predicted were also considered. Selected contigs varied in  
121 size with the shortest at 150 bp, the longest at 27,627 bp and the mean size at 1,498bp. Overall,  
122 72% could be categorized to a functional class after BLAST analysis ( $e < 10E-6$ ) to nine distinct  
123 databases (Additional file 1: Fig. S1 and Additional file 2: Table S1). Figure 1 shows an  
124 overview of the transcriptome repertoire displaying the overall percentage of contigs (% of  
125 contigs) or abundance as transcripts per million (%TPM) for all time points and conditions  
126 combined, highlighting the distribution of the mapped reads to the functional classification.  
127 Unknown contigs accounted for 28% of the contigs, but only for 6.56 % of transcriptome  
128 abundance. The most represented functional categories were secreted proteins with 25.9 % of  
129 TPM, protein synthesis (15.2 % of TPM), metabolism (14.3 % of TPM) and protein modification  
130 (11.8 % of TPM) (Fig. 1 and Additional file 3: Table S2 and Additional file 4: Fig. S2). This  
131 dataset was used to map the individual samples and determine the sand fly midgut differential  
132 expression caused by *Leishmania* infection (Additional file 3: Table S2.)

133

Fig. 1

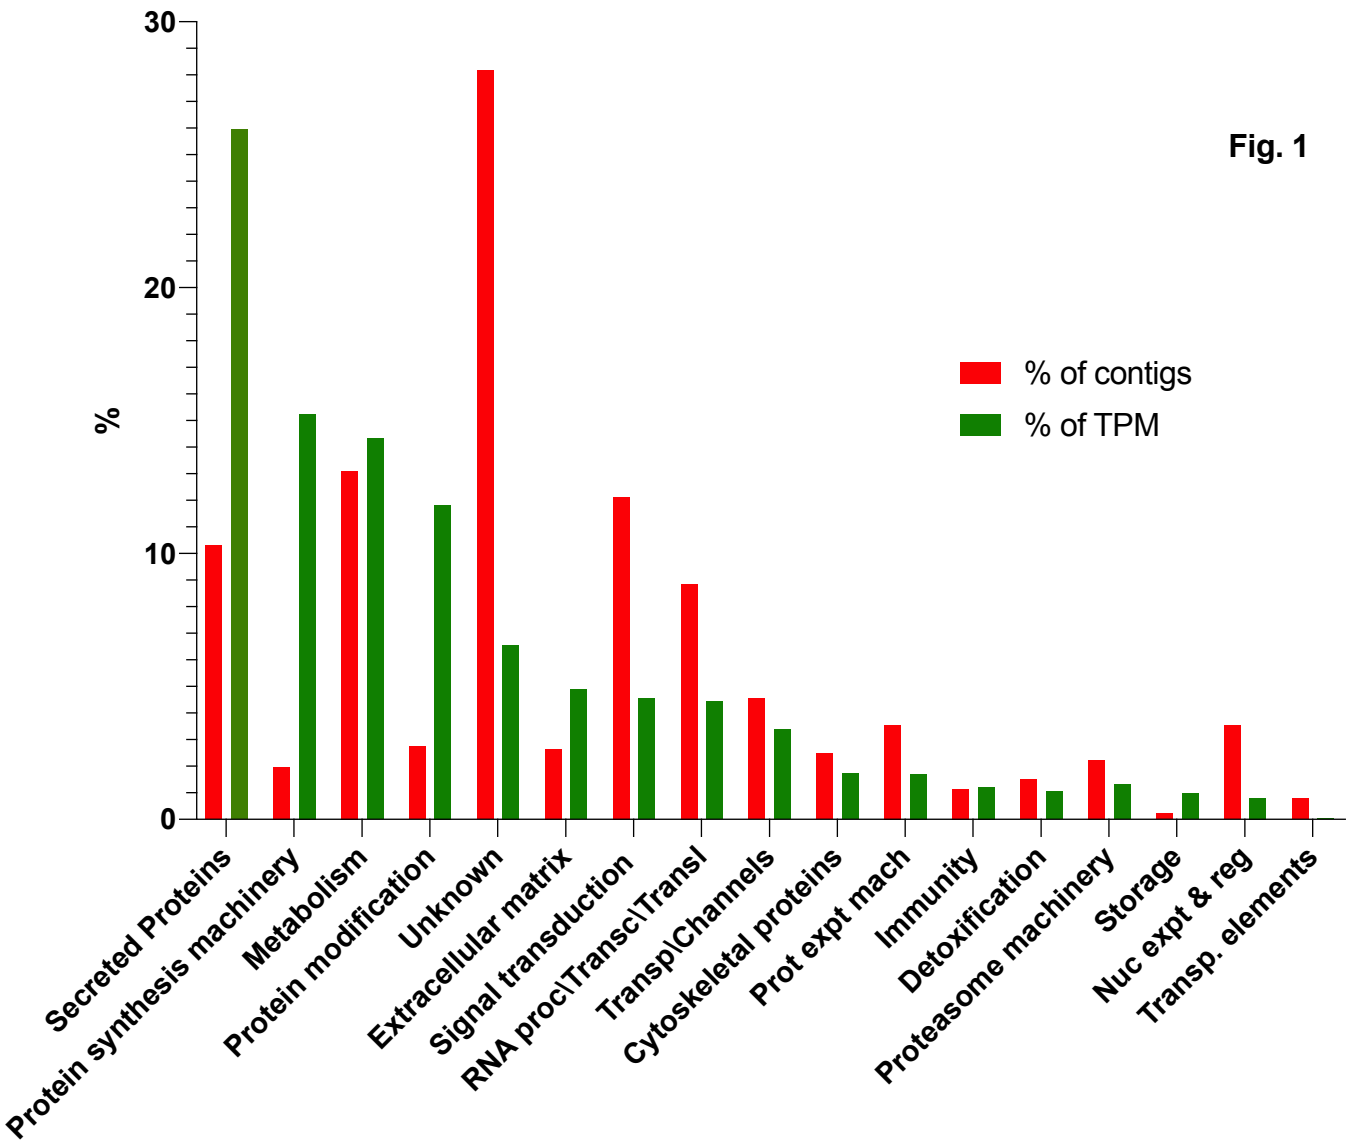

## 134 Sand fly midgut gene expression

135 The overall expression profiles of the infected and uninfected midguts obtained at seven  
136 time points each representing infected midguts enriched with a different *Leishmania* stage is  
137 summarized by PCA analyses of the average expression for each time point (Fig 2A and  
138 Additional file 5: Table S3) as well as amongst replicates (Additional file 6: Fig. S3 and  
139 Additional file 5: Table S3). The PC1 axis showed a clear separation between the midguts in  
140 which blood digestion is ongoing (Fig. 2A left side, 1d PBM/Pi and 2d PBM/Pi) from the time  
141 points at which the blood was mostly digested (Fig. 2A right side, 4d PBM/Pi) and the remaining  
142 time points where the midguts were clear of blood (Fig. 2A right side, 6d to 14 PBM/Pi). The  
143 PC1 accounted for 77.2% of the variance (Additional file 5: Table S3). On the other hand, the  
144 PC3 (rather than PC2; Additional file 6: Fig. S3B) sorted for the most part the infected from the  
145 uninfected samples (Fig. 2A) and only accounted for 4.1% of the variance (Additional file 5:  
146 Table S3).

147 The expression profiles of midguts were validated by assessing the expression levels of  
148 selected midgut genes ( $n = 28-35$ ; Additional file 7: Table S4) using the nCounter technology  
149 (NanoString). The mean  $\log_2$  fold change (LFC) of infected over uninfected samples was  
150 compared at each time point with LFC data obtained with the RNA-Seq technique for the same  
151 genes. Representative genes participate in chitin metabolism/ peritrophic matrix scaffolding  
152 (peritrophins and chitinases), immunity (defensin, catalase, and spatzle), digestion (amylase and  
153 chymotrypsin) among others are depicted in Fig. 2B-H. The regression analyses between the  
154 expression levels obtained with nCounter and RNA-Seq were statistically significant ( $p <$   
155 0.0001) for all seven time points (Fig. 2B-H), and the regression coefficients were greater than  
156 0.5 for all time points, except 6d ( $R^2 = 0.40$ ) and 12d ( $R^2 = 0.47$ ) as shown in Fig. 2B-H.



**Fig. 2**

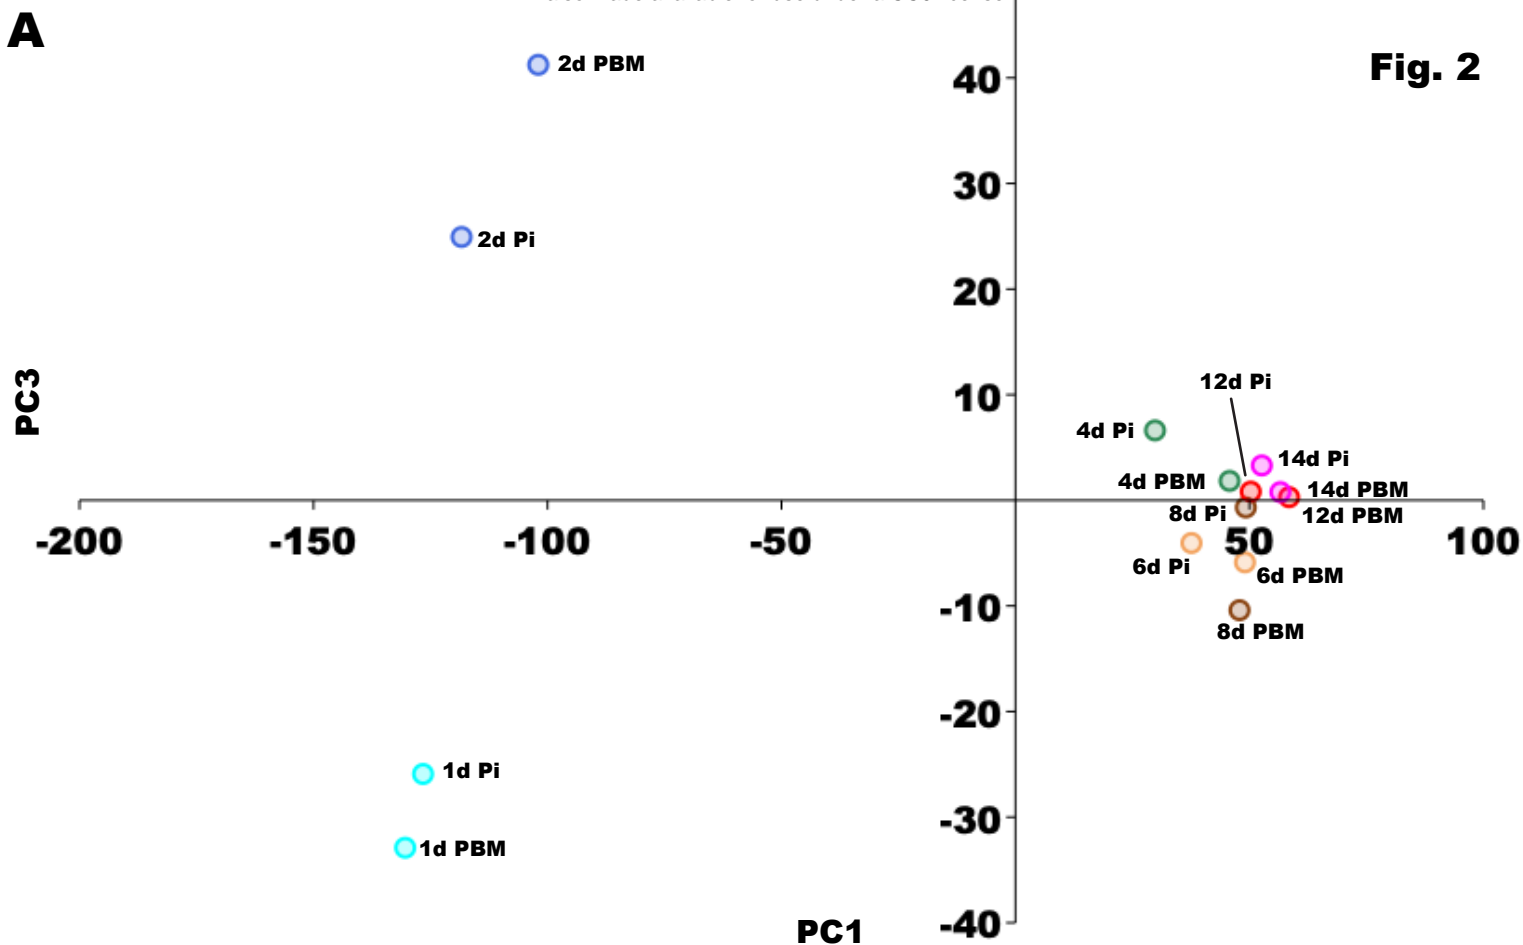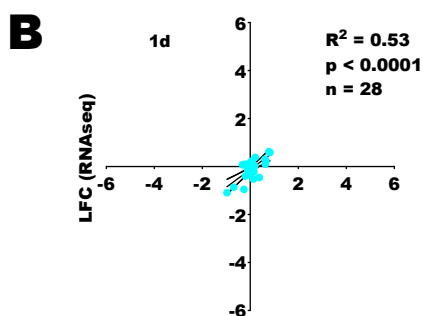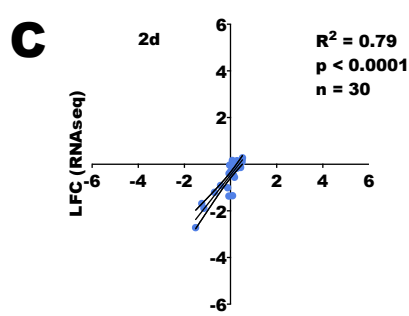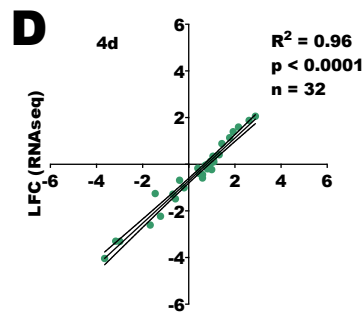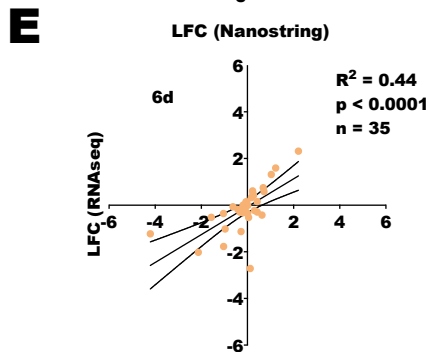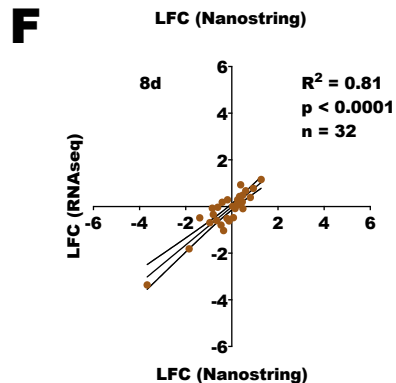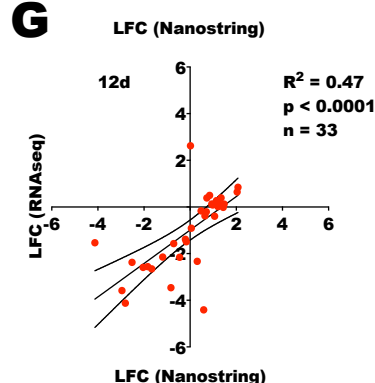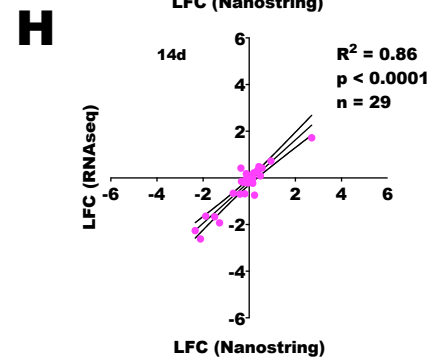

157

158 **Modulation of sand fly midgut gene expression by *Leishmania* infection**

159 Differences in gene expression between *Leishmania*-infected over uninfected midguts at  
 160 the seven time points were assessed. Overall, such differences accounted for only 113  
 161 differentially expressed transcripts ( $1 < \text{LFC} > 1$ ;  $q\text{-value} < 0.05$ ; Additional file 8: Table S5).  
 162 The number of DE genes gradually increased from 2 genes on 1d to 53 genes on 4d (Fig. 3A).  
 163 On 6d, the number of DE genes decreased to 20 genes and went further down to 15 genes on 8d  
 164 (Fig. 3A). Four days later, there was a strong increase in the number of DE genes (12d = 32  
 165 genes), which was reduced to 13 genes two days later at 14d (Fig. 3A).

166

167

168 **Table 1** Selected midgut transcripts differentially regulated upon *Leishmania* infection.

| Transcript name          | Best match                                              | E-value  | Time-Point(s) | Up/Down Regulated |
|--------------------------|---------------------------------------------------------|----------|---------------|-------------------|
| <b>lulogut44569</b>      | Forkhead/HNF-3-related transcription factor             | 0        | 2d            | Down              |
| <b>lulogut32574</b>      | 17-beta-hydroxysteroid dehydrogenase 13-like isoform X2 | 8E-66    | 2d            | Down              |
| <b>lulogut40195</b>      | juvenile hormone esterase                               | 6.00E-29 | 2d            | Down              |
| <b>lulogutSigP-24104</b> | JAV08889.1 juvenile hormone binding protein             | 0        | 4d            | Down              |
| <b>lulogutSigP-40401</b> | Chitin binding Peritrophin-A                            | 4.00E-12 | 4d            | Down              |
| <b>lulogutSigP-8812</b>  | attacin precursor                                       | 5.00E-64 | 4d            | Down              |
| <b>lulogut16004</b>      | Amino acid transporters                                 | 0        | 4d            | Down              |
| <b>lulogutSigP-40100</b> | Facilitated trehalose transporter Tret1                 | 5.00E-93 | 4d            | Down              |
| <b>lulogutSigP-25516</b> | chymotrypsin-2                                          | 8.00E-80 | 4d            | Up                |
| <b>lulogutSigP-33169</b> | Trypsin-like serine protease                            | 4.00E-67 | 4d            | Up                |
| <b>lulogutSigP-12857</b> | carboxypeptidase A                                      | 0        | 4d/6d         | Up                |
| <b>lulogutSigP-53922</b> | Secreted metalloprotease                                | 0        | 6d            | Up                |

**A**

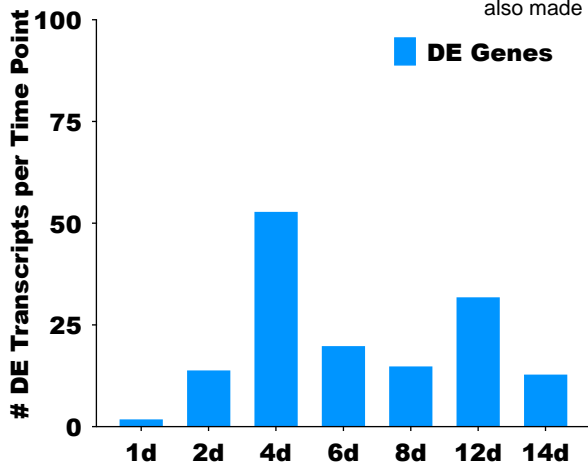

**B**

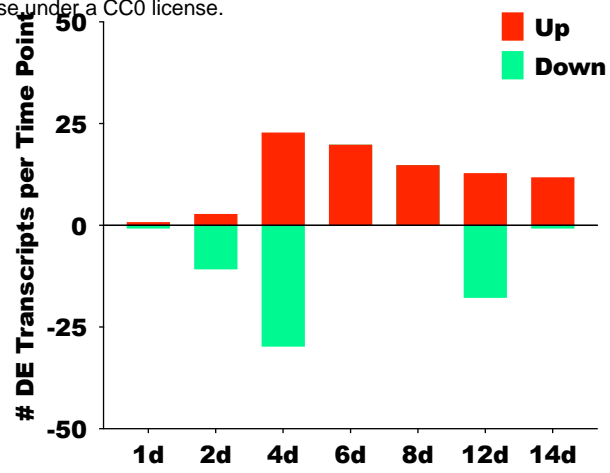

**Fig. 3**

**C**

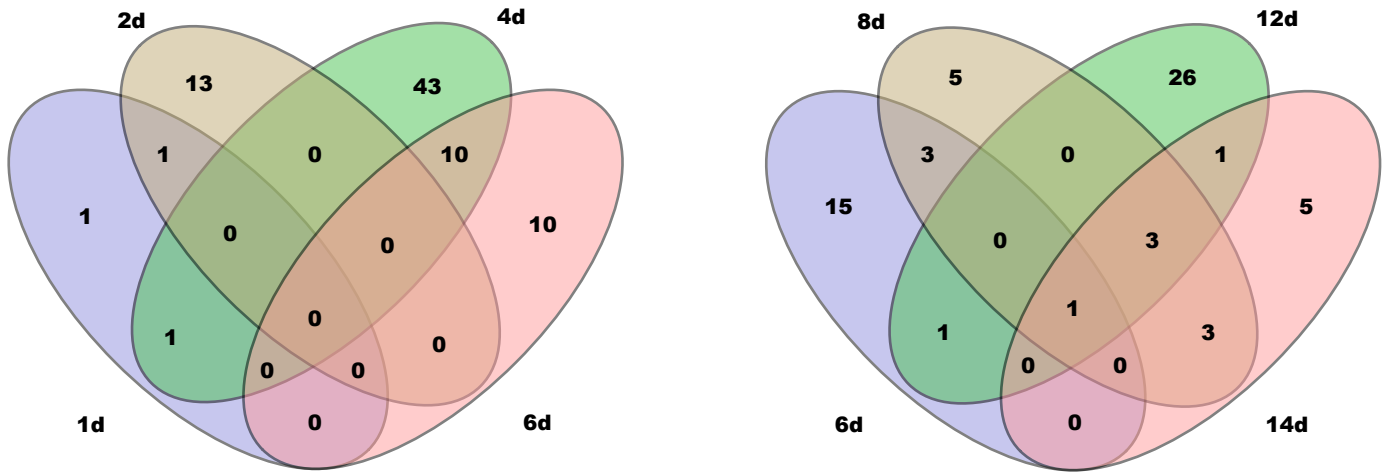

**D**

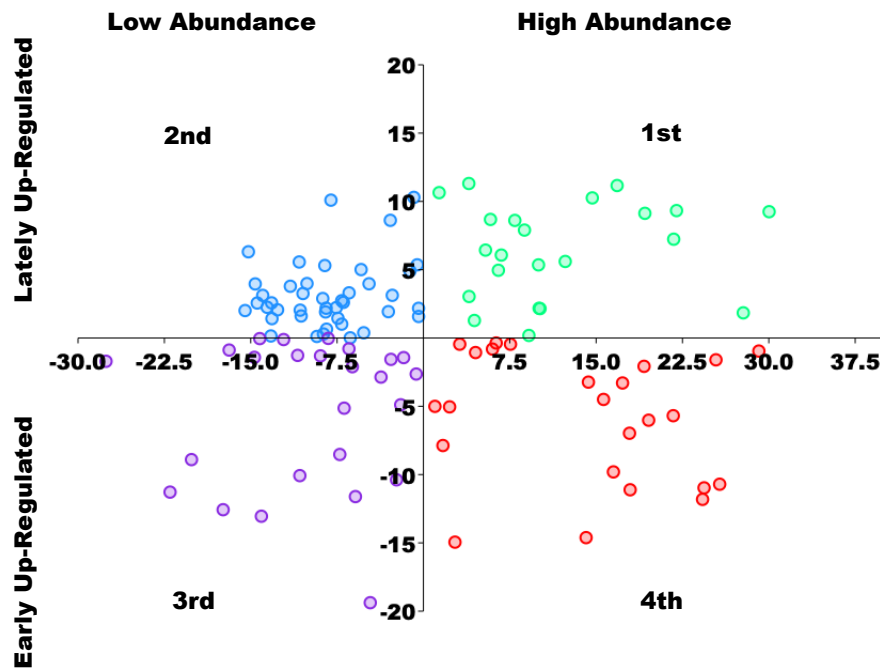

**E**

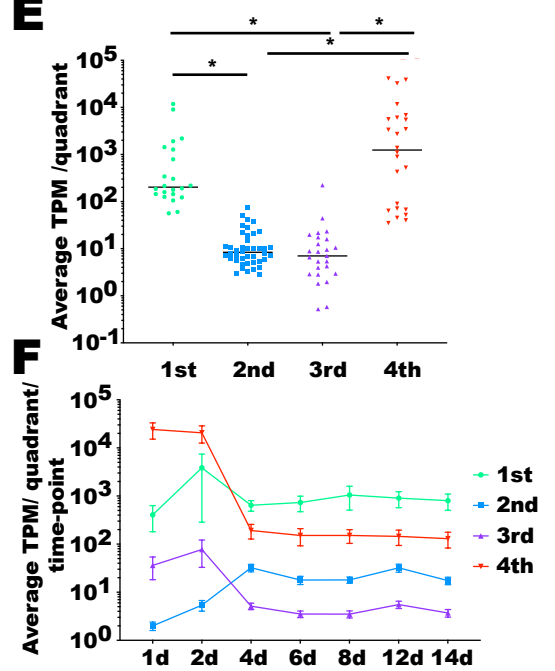

|                          |                                                 |          |            |      |
|--------------------------|-------------------------------------------------|----------|------------|------|
| <b>lulogutSigP-646</b>   | Insect allergen related repeat                  | 5.00E-28 | 4d         | Up   |
| <b>lulogutSigP-16736</b> | Insect allergen related repeat                  | 4.00E-30 | 4d/6d      | Up   |
| <b>lulogutSigP-13949</b> | Insect allergen related repeat                  | 2.00E-42 | 4d/6d      | Up   |
| <b>lulogutSigP-13652</b> | Insect allergen related repeat                  | 2.00E-32 | 4d/6d      | Up   |
| <b>lulogutSigP-54492</b> | Insect allergen related repeat                  | 5.00E-42 | 6d         | Up   |
| <b>lulogutSigP-8474</b>  | probable cytochrome P450 6a14                   | 0        | 8d/12d/14d | Up   |
| <b>lulogut46050</b>      | cytochrome P450 4C1                             | 0        | 8d         | Up   |
| <b>lulogut33084</b>      | Cytochrome P450 CYP3/CYP5/CYP6/CYP9 subfamilies | 0        | 12d        | Up   |
| <b>lulogut34615</b>      | probable cytochrome P450 6d5                    | 0        | 8d/14d     | Up   |
| <b>lulogut41307</b>      | JAV11511.1 ecdysteroid kinase                   | 0        | 12d        | Down |

169

170           Amongst the midgut genes differentially expressed upon *Leishmania* infection, some  
171 appear to play a role in specific biological processes (Table 1; Additional File 8: Table S5). A  
172 gene encoding the transcription factor Forkhead/HNF-3 (lulogut44569) was down-regulated on  
173 2d. Genes encoding proteins potentially involved with metabolism of steroid hormones, such as  
174 17-beta-hydroxysteroid dehydrogenase 13-like (lulogut32574) and juvenile hormone esterase  
175 (lulogut40195) were down-regulated on 2d; a putative juvenile hormone binding protein  
176 (lulogutSigP-24104) was down-regulated on 4d; and an ecdysteroid kinase (lulogut41307) was  
177 down-regulated on 12d. Also, genes encoding a peritrophic matrix protein (lulogutSigP-40401),  
178 involved with the peritrophic matrix scaffolding, the antimicrobial peptide attacin (lulogutSigP-  
179 8812), and amino acid (lulogut16004) and trehalose (lulogutSigP-40100) transporters, were  
180 down-regulated on 4d. Amongst the up-regulated genes, multiple peptidases and proteases were  
181 up-regulated on 4d and 6d. Likewise, multiple insect allergen proteins (microvilli proteins) of  
182 unknown function were up-regulated on 4d and 6d upon *Leishmania* infection. From 8d  
183 onwards, multiple cytochrome p450 transcripts were up-regulated.

184           The presence of *Leishmania* in the midgut led to more genes being down-regulated at d2  
185 and up-regulated at later time points, except on 12d (Fig. 3B and Additional File 8: Table S5 and  
186 Additional File 9: Fig. S4). On 1d, 2d, and 4d, early time points, 1, 11, and 30 genes were down-  
187 regulated (Fig. 3B and Table 2 and Additional File 8: Table S5 and Additional File 9: Fig. S4)  
188 whereas 1, 3, and 23 genes were up-regulated (Fig. 3B and Table 3 and Additional File 8: Table  
189 S5 and Additional File 9: Fig. S4), respectively. On 6d and 8d, on the other hand, 20 and 15  
190 genes were up-regulated, yet none were down-regulated (Fig. 3B and Additional File 9: Fig. S4).  
191 Infected midguts on day 12 displayed 13 up-regulated genes compared to 18 down-regulated  
192 ones (Fig. 3B and Additional File 9: Fig. S4). The 14d time point exhibited more up-regulated  
193 (12 genes) than down-regulated (1 gene) genes in infected over uninfected midguts (Fig. 3B and  
194 Additional File 9: Fig. S4).

195           Venn diagrams show that most of genes were differentially expressed at specific time  
196 points (Fig. 3C and Additional File 10: Table S6). In the comparisons between early time points  
197 (1d through 6d; Fig. 3C, left panel), 1 out of the 2 DE genes on 1d was only modulated at that  
198 time point (Fig. 3C, left panel). Similarly, 13 out of the 14 genes, and 43 out of 54 genes, were  
199 uniquely DE on 2d and 4d, respectively (Fig. 3C, left panel). Only the 6d DE genes exhibited as  
200 many unique as shared with 4d DE genes (10 genes; Fig. 3C, left panel). The comparisons of DE  
201 genes between later time points (6d through 14d) showed a greater number of shared DE genes  
202 between time points (Fig. 3C, right panel). For instance, only 5 out of 15, and 5 out of 13, DE  
203 genes were unique to 8d and 14d, respectively (Fig. 3C, right panel). The 12d midguts, on the  
204 other hand, exhibited 26 uniquely expressed genes out 32, the most amongst the late time points  
205 (Fig. 2C, right panel).

206           The expression patterns of all DE genes across time points were assessed through PCA  
207 analysis (Fig. 3D and Additional file 11: Table S7). The 113 DE genes were mapped onto a two-  
208 dimensional space (expression space), whereby DE genes located close together displayed  
209 similar expression profiles through time than those that mapped farther away (Fig 3D). In fact,  
210 the DE genes located in the first quadrant of the expression space exhibited about 25-fold greater  
211 overall expression levels than those that mapped onto the second and third quadrants (Fig. 3E;  
212 Mann Whitney U test,  $p < 0.0001$ ). Likewise, the DE genes located on the fourth quadrant of the  
213 expression space exhibited about 177-fold higher overall expression levels than those that  
214 mapped onto the second and third quadrants (Fig. 3E; Mann Whitney U test,  $p < 0.0001$ ).  
215 Looked at through time, the location of the DE genes in different quadrants further highlighted  
216 temporal expression differences in both early blood-fed infected midguts and late time point  
217 infected midguts (Fig. 3F; Additional file 12: Fig. S5). For example, the DE genes mapped onto  
218 the first and second quadrants were either down-regulated at early time points (1d and/or 2d) and  
219 up-regulated at later time points (d4 onwards; Fig. 3F and Additional file 12: Fig. S5). On the  
220 other hand, the DE genes located on the third and fourth quadrants were up-regulated at 1d and  
221 2d and down-regulated from 4d onwards (Fig. 3F and Additional file 12: Fig. S5). Hence, DE  
222 genes located on the first quadrant were expressed at high abundance and lately up-regulated; DE  
223 genes mapped onto the second quadrant expressed transcripts at low abundance and were up-  
224 regulated at late time points; the third quadrant housed the DE genes expressed at low abundance  
225 and up-regulated at early time points; and the DE genes transcribed at high abundance and up-  
226 regulated at early time points were localized on the fourth quadrant of the transcriptional space  
227 (Fig. 3D).  
228

## 229 **Differentially expressed genes at different time points**

230           The up-regulated (Fig. 4A-H and Table 2 and Additional file 13: Table S8) and down-  
231 regulated (Fig. 5A-F and Table 3 and Additional file 14: Table S9) DE genes at each time point  
232 were plotted onto the transcriptional space in order to assess whether or not the expression of the  
233 genes modulated by *Leishmania* across time points followed a specific or a random expression  
234 pattern by mapping onto specific quadrants or randomly. All the 113 DE genes were distributed  
235 throughout the four quadrants in different proportions: 20%, 37%, 22%, and 21% of the DE  
236 genes mapped onto the first through fourth quadrants, respectively (Fig. 4A and Table 2). The  
237 up-regulated genes on 1d and 2d were mostly located in the second and third quadrants, which  
238 housed genes transcribed at low abundance (Fig. 4B-C and Table 2). However, the reduced gene  
239 counts at 1d and 2d precludes statistical comparisons. On the other hand, the DE genes at 4d  
240 through 8d followed specific expression patterns (Chi-square test,  $p < 0.01$ ; Fig. 4D-F). At such  
241 time points, 74% (4d), 85% (6d), 87% (8d) of genes up-regulated by *Leishmania* infection  
242 mapped onto either the first or fourth quadrant, which housed genes transcribed at high  
243 abundance (Fig. 4D-F and Table 2). Although not statistically significant, mapping at 12d and  
244 14d followed a similar pattern where 85% (12d; Fig. 4G and Table 2) and 58% (14d; Fig. 4H and  
245 Table 2) of the genes mapped onto either the first or fourth quadrant. However, the proportion of  
246 up-regulated genes that mapped on such quadrants gradually changed through time, with more  
247 genes mapping onto the fourth quadrant at earlier time points to more genes mapping onto the  
248 first quadrant at later time points (Figs 4F-G and Table 2). For instance, 61% and 65% of the up-  
249 regulated genes on 4d and 6d mapped onto the fourth quadrant whereas only 13% and 20% of  
250 such genes were located on the first quadrant, respectively (Fig. 4D-E and Table 2). In contrast,  
251 on 8d, 47% of the *Leishmania* up-regulated genes were located in the first quadrant whereas 40%

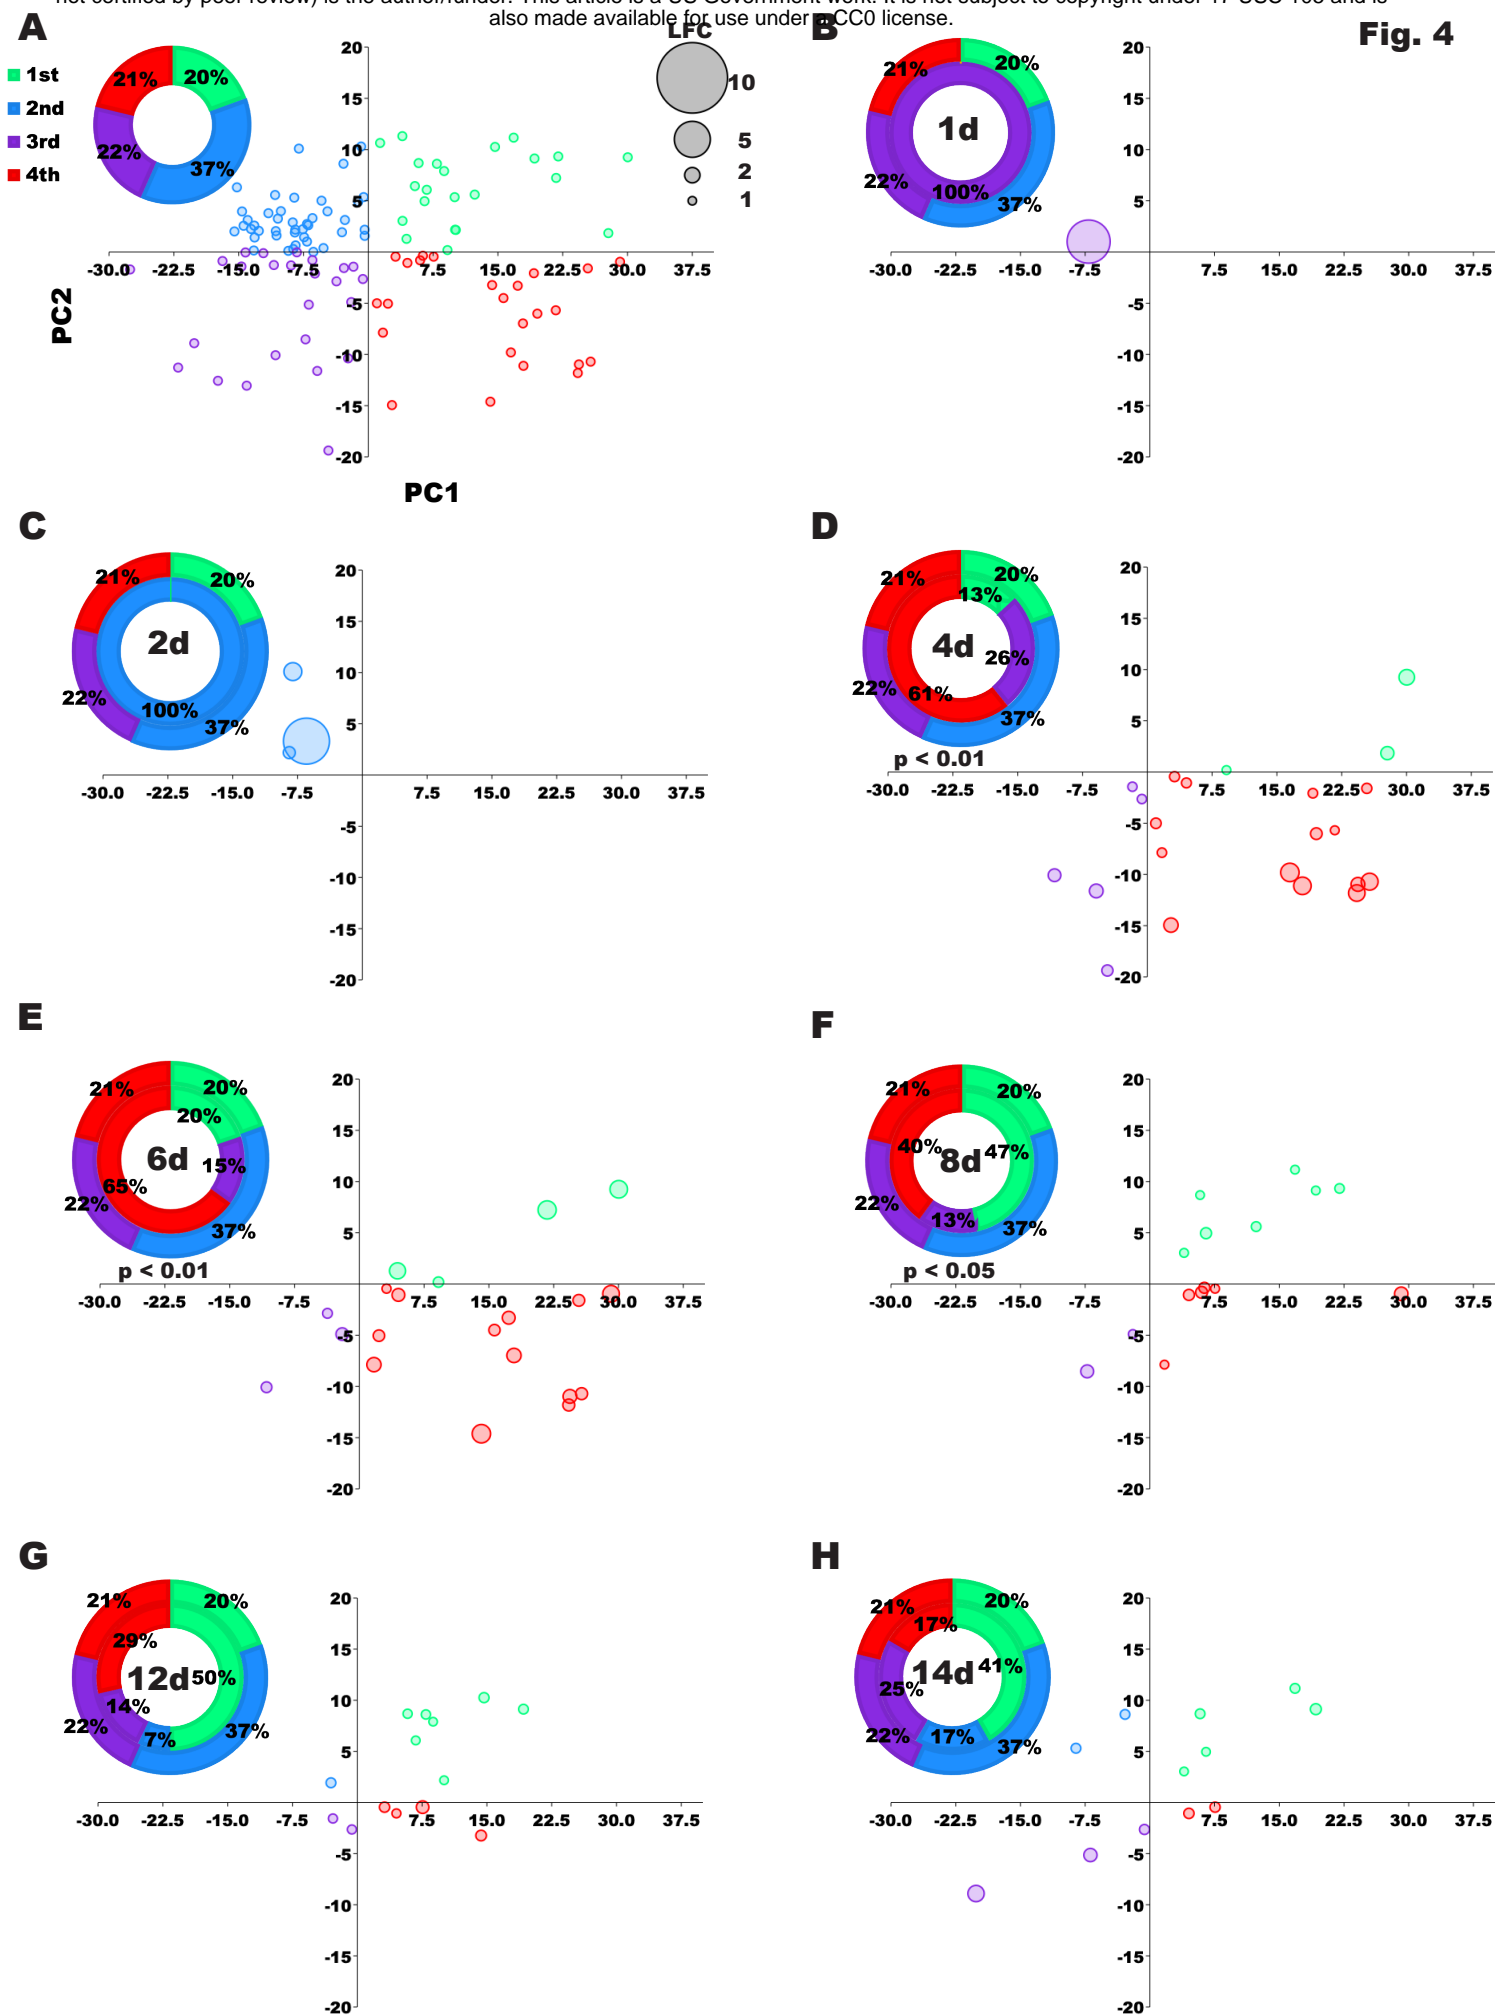



252 of such genes were mapped onto the fourth quadrant (Fig. 4F and Table 2). Thereby, most of the  
253 DE midgut genes up-regulated by *Leishmania* infection encompassed highly expressed genes,  
254 yet the up-regulated genes were more predominant at early time points (4d and 6d) and the late  
255 expressed genes were more predominant at late time points (8d to 14d; Fig. 4D-H and Table 2).  
256 Interestingly, most of the midgut genes DE by *Leishmania* infection were up-regulated by up to  
257 32-fold ( $LFC < 5$ ; Fig. 4A-H and Table 2).

258         Regarding the midgut genes down-regulated by *Leishmania* infection (Fig. 5A-F and  
259 Table 3 and Additional file 14: Table S9), none were DE on 6d and 8d (Fig. 5B and Table 3).  
260 Contrasting to the midgut up-regulated genes, which exhibited similar expression profiles and  
261 were fine-tuned through time (Fig. 5D-F and Table 3), for the most part the midgut down-  
262 regulated genes displayed more diverse expression patterns, highlighted by the random  
263 distribution of such genes across the transcriptional space on 1d and 2d (Fig. 5B-C; Table 3), and  
264 12d and 14d (Fig. 5 E-F; Table 3). On the other hand, the 4d midguts displayed most of the  
265 down-regulated genes on the second quadrant (73%,  $p < 0.05$ ; Fig. 5D and Table 3), belonging to  
266 the group transcribed at low abundance and up-regulated late in infection (Fig. 5D and Table 3).  
267 In addition, many of the genes were down-regulated in *Leishmania*-infected midguts by more  
268 than 32-fold ( $LFC > -5$ ; Fig. 5A-F and Table 3).

269

## 270 **Functional profiles of the differentially expressed genes at different time points**

271         Although the midgut genes up- and down-regulated by *Leishmania* infection exhibited  
272 different expression patterns across time points (Figs. 4 and 5), such DE genes belonged to the  
273 same functional groups for the most part (Fig. 6 and Tables 2 and 3 and Additional file 15:  
274 Table S10). Regarding the up-regulated genes, 28%, 38%, and 18% belonged to the

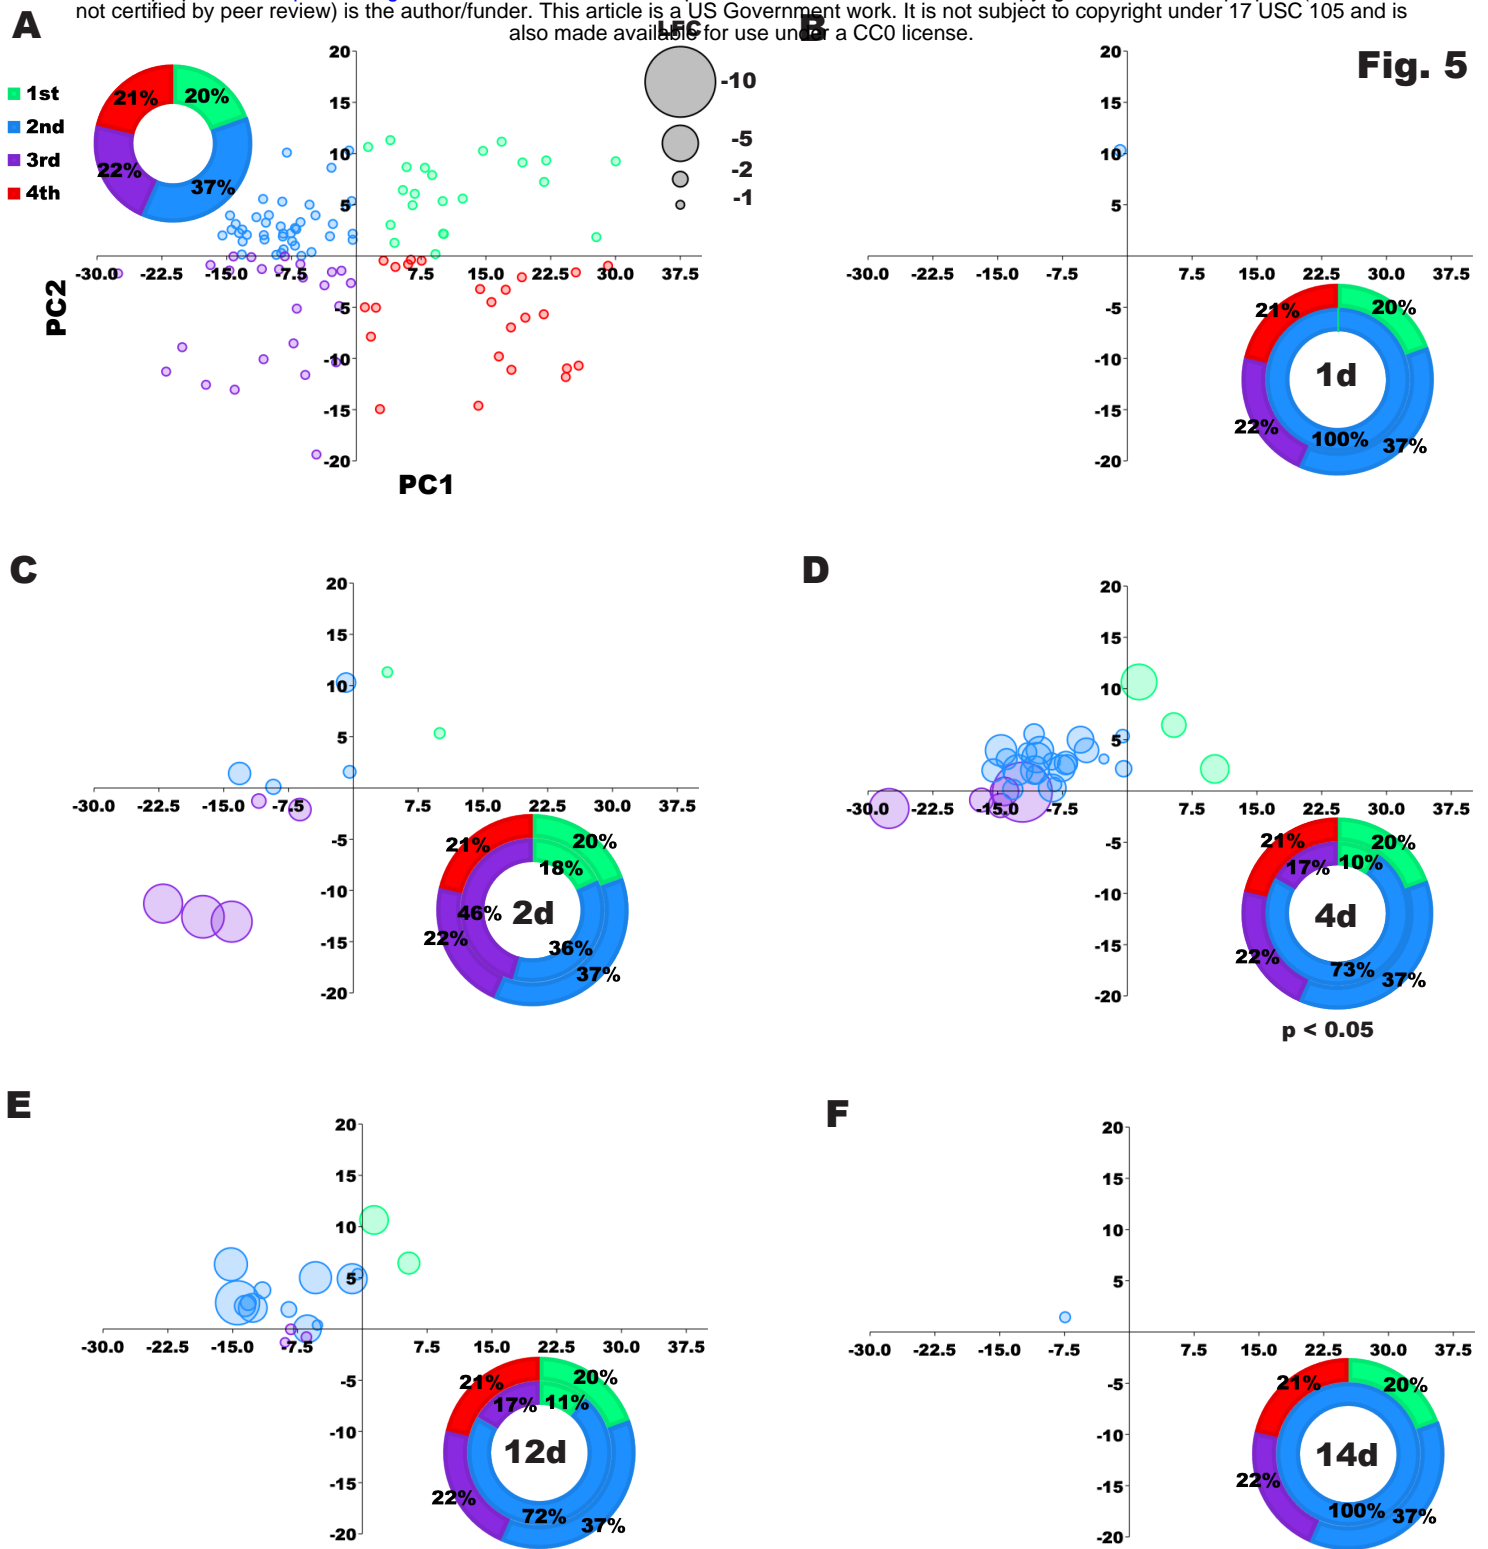

275 detoxification (detox), metabolism (met), and secreted (s) protein molecular functions,  
276 respectively (Fig. 6A and Table 2). In fact, the enrichment of such molecular functions amongst  
277 the up-regulated genes was consistent through time (Fig. 6B and Table 2): between 2d through  
278 14d for the metabolism function; and between 8d and 14d for the detoxification function. For the  
279 secreted protein category, the enrichment of up-regulated genes was more restricted to 4d and 6d  
280 (Fig. 6B and Table 2). At earlier time points (1d and 2d), the few up-regulated genes perform  
281 different functions ranging from transporter channels (tr, 1d) to proteasome machinery (prot, 2d;  
282 Fig. 6B and Table 2). Regarding midgut genes down-regulated by the *Leishmania* infection, 34%  
283 of these genes belonged to the metabolism (22%) and secreted protein (12%) functional groups  
284 (Fig. 6C and Table 3). Both categories were consistently enriched on 4d, 12d, and 14d (Fig. 6D  
285 and Table 3). At earlier time points (1d and 2d), transporter channels (tr, 1d and 2d) and  
286 signaling transduction (st, 2d) were the most enriched molecular functions amongst the down-  
287 regulated genes (Fig. 6D and Table 3). All the molecular functions identified across time points  
288 were matched by analogous GO terms (Additional file 16: Table S11 and Additional file 16:  
289 Table S12).

290 In order to investigate in-depth the functional profiles of the DE genes, we broke down  
291 the most predominant functional classes into subclasses. For the midgut DE genes belonging to  
292 the detoxification molecular function (detox), the cytochrome P450 gene family encompassed  
293 76% of the up-regulated genes (Fig. 7A and Table 2 and Additional file 15: Table S10). Such  
294 genes were consistently up-regulated between 6d and 14d (Fig. 7B and Table 2). In contrast, the  
295 down-regulated genes belonging to the detoxification molecular function were enriched in  
296 metallothioneins (4d and 12d, thio; Fig. 7C and D and Table 3). As far as the DE midgut genes  
297 belonging to the metabolism function, 55% of the up-regulated genes were related to the

**A**

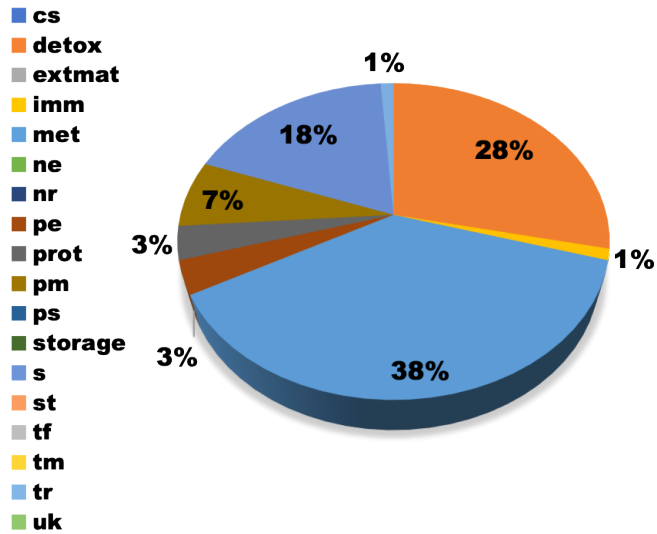

**B**

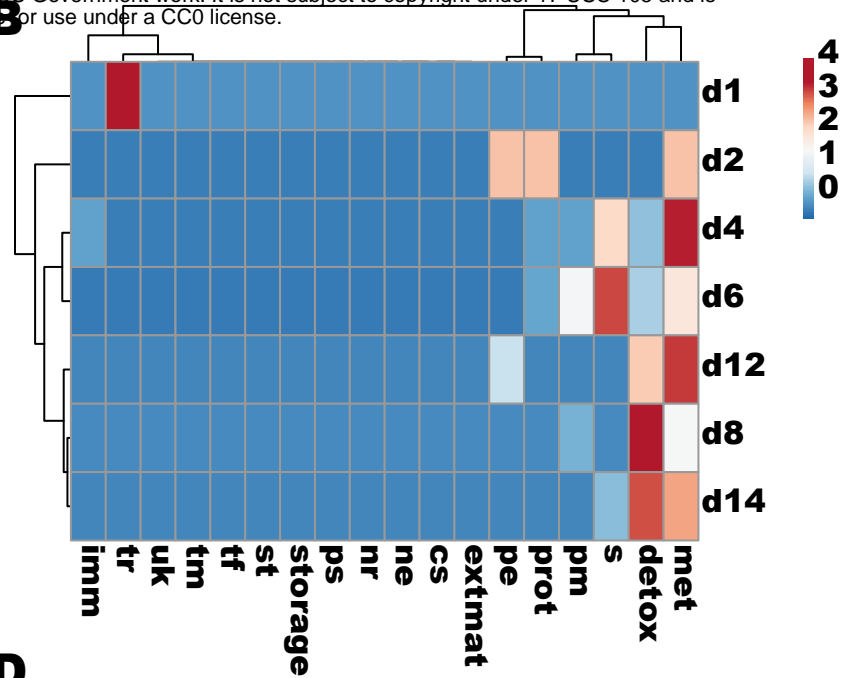

**C**

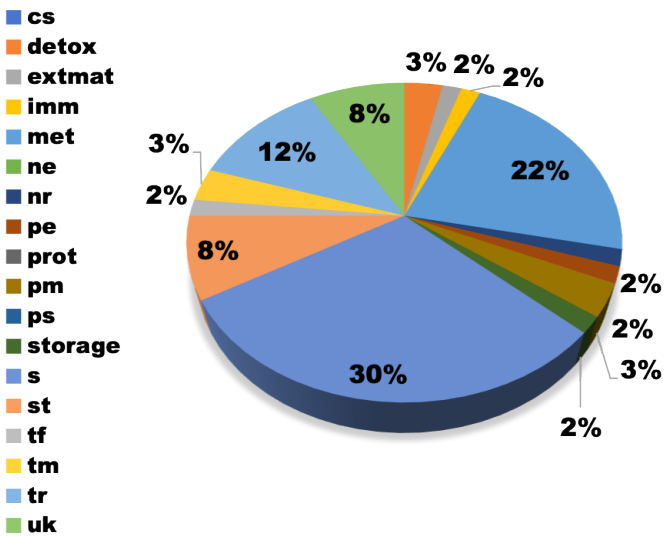

**D**

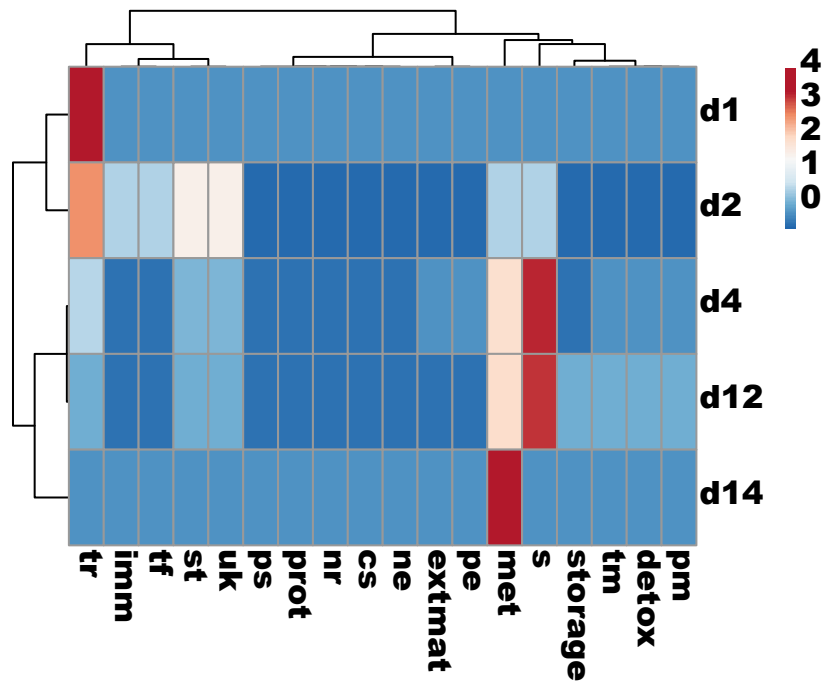

**Fig. 6**

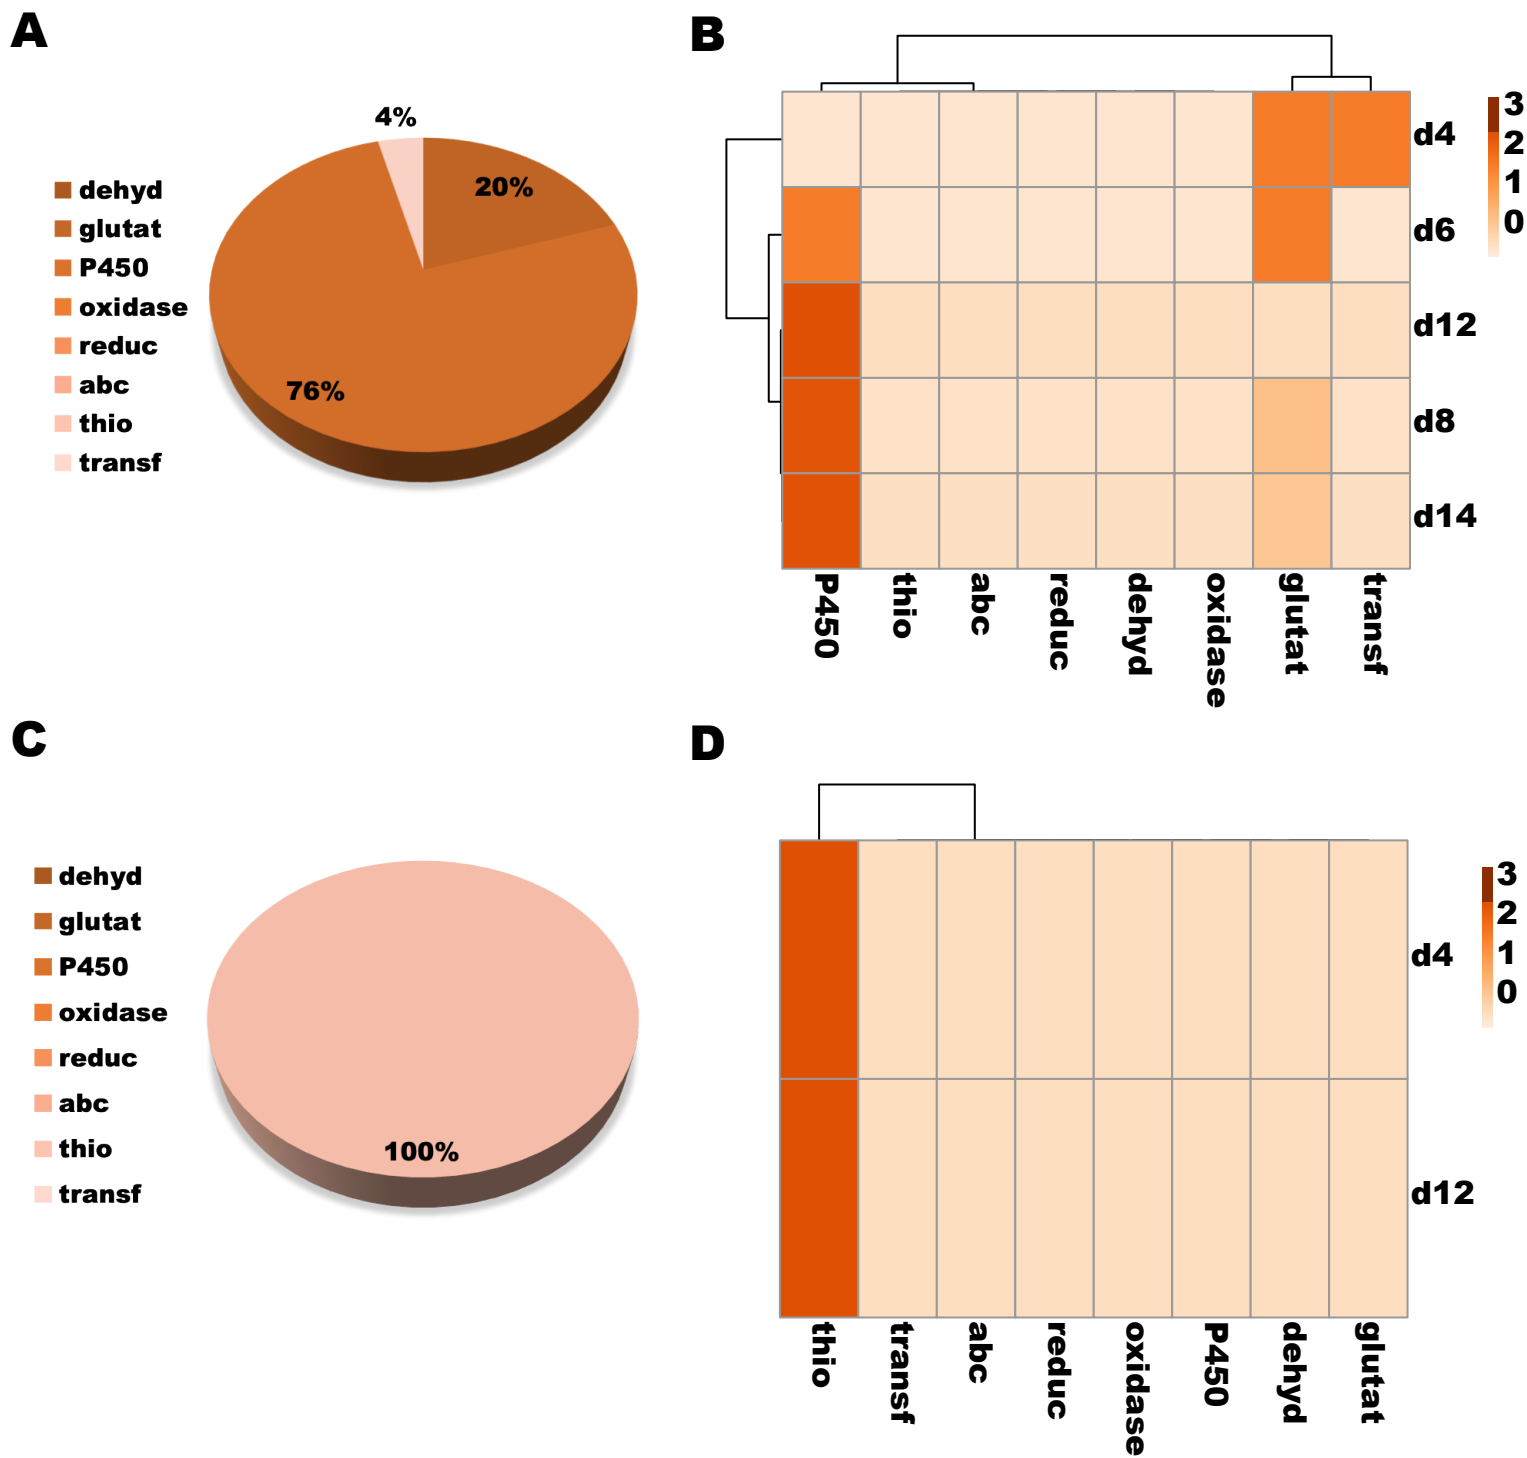

**Fig. 7**

298 metabolism of lipids (lipd; Fig. 8A and Table 2) which was consistently the most predominant  
299 between 6d and 14d (Fig. 8B). Among the down-regulated genes performing metabolic functions  
300 (Fig. 8C-D and Table 3), most (31%) participated in the metabolism of lipids (lipd) at early time  
301 points (2d and 4d) or nucleotides (nuc) on 12d, a later time point (14d, Fig. 8C-D and Table 3).  
302 Regarding the DE midgut genes encompassing the secreted proteins (Fig. 9), 50% of those up-  
303 regulated belonged to the ‘other category’ (s, multiple protein functions) that was enriched in  
304 transcripts of the insect allergen proteins (Fig. 9A; Table 2 and Table S9), also known as  
305 microvilli proteins. Although the insect allergens, along with the mucins, and to a lesser extent  
306 metalloproteases (metal), were more predominant on 4d and 6d (Fig. 9B and Table 2), up-  
307 regulated transcripts encoding proteins of unknown function were enriched at 14d, a later time  
308 point (Fig. 9B and Table 2). Among the down-regulated transcripts encoding secreted proteins,  
309 44% belonged to the unknown function (31%, uk) and “other” (17%, s) categories (Fig. 9C and  
310 Table 3). The “other” category (s) was consistently down-regulated on 4d and 12d (Fig. 9D and  
311 Table 3) and was enriched in transcripts encoding juvenile hormone (JH) binding proteins as  
312 well as attacin (Table 3). Transcripts of secreted proteins related to the digestion of lipids (met-li)  
313 were down-regulated on 2d (Fig. 9D and Table 3).

314

## 315 **Discussion**

316 In this work, we have carried out a broad RNA-Seq investigation to assess the effects of  
317 *Leishmania* infection in sand fly midgut gene expression. As no sand fly genome is available at  
318 the standards to be used as a reference for read mapping, all the reads obtained were assembled  
319 de novo into 13,841 putative transcripts. Such transcripts were then used as a reference for gene  
320 expression quantification and comparisons between infected and uninfected samples. Out of

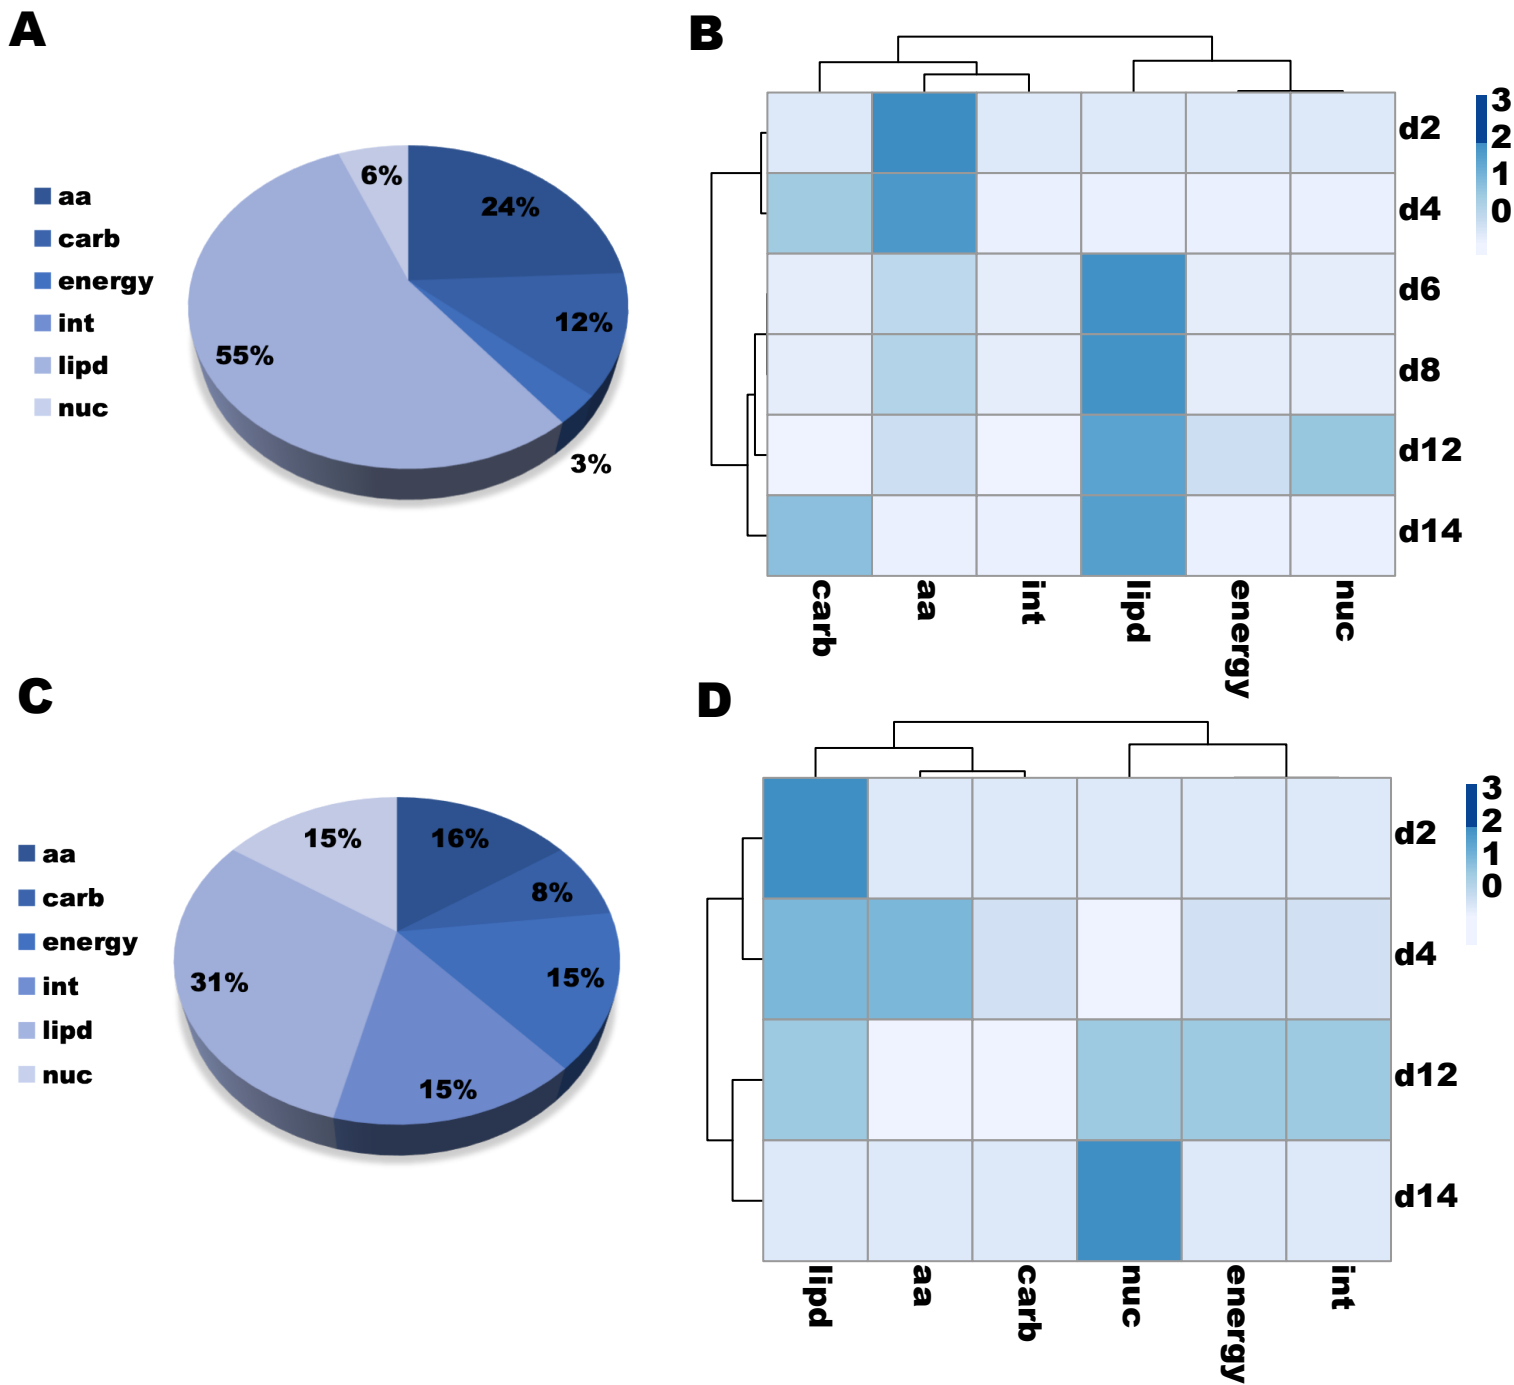

**Fig. 8**

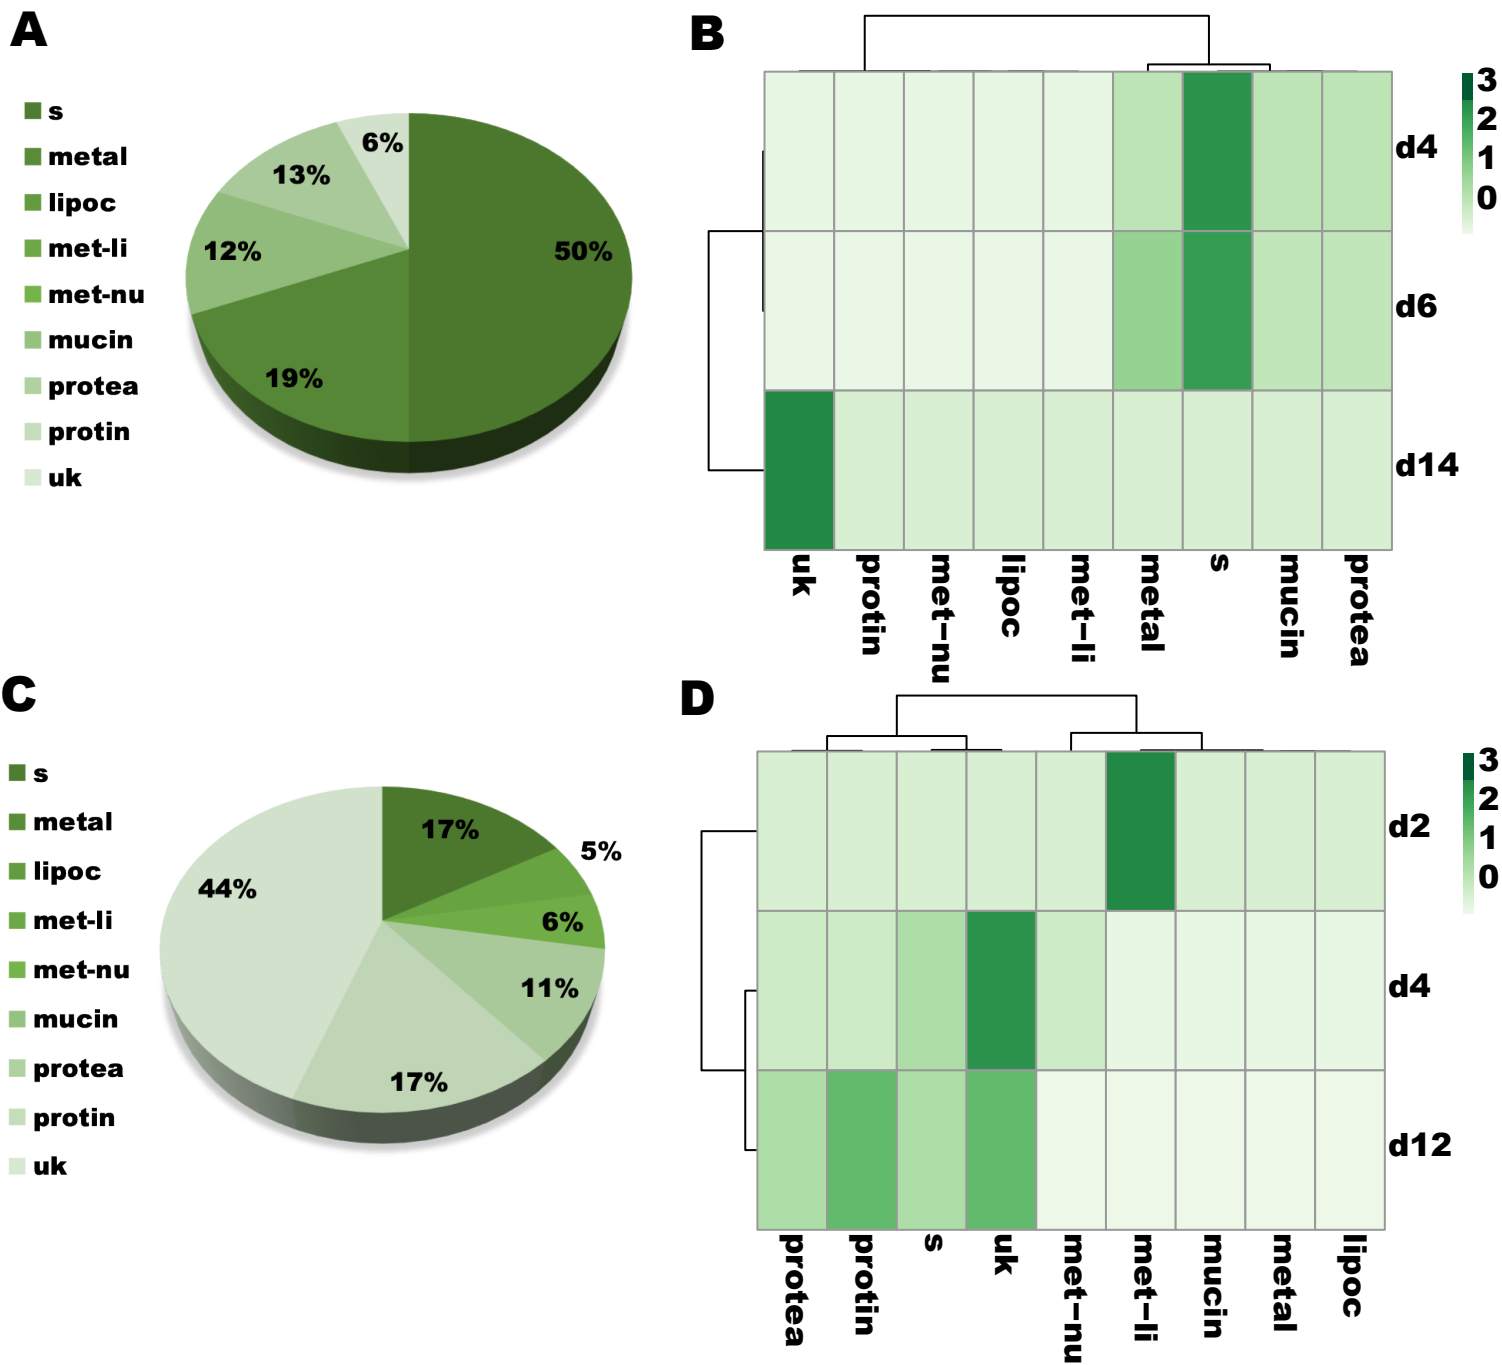

**Fig. 9**



321 seven time points, only about 1% of the genes were differentially expressed (113 genes) by  
322 *Leishmania* infection, highlighting the extent of the adaptation of *Le. infantum* to its natural  
323 vector, the sand fly *Lu. longipalpis*.

324 Multiple midgut genes displaying differential expression upon *Leishmania* infection in  
325 cDNA libraries of *Le. infantum*-infected *Lu. longipalpis* midguts [19] were also differentially  
326 expressed in our RNA-Seq libraries. For instance, all four insect allergen proteins (microvilli  
327 proteins), multiple digestive enzymes (proteases and peptidases), an astacin-metalloprotease, as  
328 well as a peritrophic matrix protein were differentially regulated by *Leishmania* infection in both  
329 studies [19].

330 The limited influence of *Leishmania* in midgut gene expression as observed in this study  
331 was further investigated by PC analysis. As indicated by PC1, most of the variance (77%) in the  
332 transcriptional levels across midgut samples was caused by the presence (or lack of) blood in the  
333 midguts, sorting out the early (d1 and d2; blood engorged) from late (d4 onwards; blood passed)  
334 time points. Even though, PC2 (6.4%) and PC3 (4.1%) exhibited similar levels of variance, PC3  
335 accounted for most of the variance sorting infected from uninfected midguts, and likely  
336 represents the differential expression of the 113 genes modulated by *Leishmania* infection. These  
337 findings also suggest that other factors not controlled for by the experimental design accounted  
338 for the variance observed in PC2. Along these lines, it is noteworthy that *Leishmania* infection in  
339 sand fly midguts also modify the microbiota composition [17], which may also have affected  
340 gene expression in the midgut samples.

341 It is worth noting that multiple genes DE upon *Leishmania* infection were unique to a  
342 particular time point, being more pronounced in early time points. This phenomenon may be  
343 explained by the enrichment of different *Leishmania* stages at specific time points. For instance,

344 time points 1d, 2d, 4d, and 6d are enriched in amastigotes and transitional stages, and procyclic,  
345 nectomonad, and leptomonad promastigotes, respectively. From 6d onwards, *Leishmania*  
346 parasites undergo metacyclogenesis: hence, there is a gradual increase in the proportions of  
347 metacyclic compared to leptomonad promastigotes through time, which can explain the overlap  
348 of DE genes between midguts on 8d and the other late time points. Surprisingly, we observed a  
349 burst of down-regulated DE genes on 12d that was not observed on 14d. At both time points the  
350 midgut infection is very similar as far as parasite stage and density, a phenomenon that needs to  
351 be further investigated.

352         In order to complete its life cycle in the sand fly midgut, *Leishmania* needs not only to  
353 develop and differentiate into the infective metacyclic stage, but also to escape the barriers  
354 imposed by the sand fly midgut early in the infection (day 1-5). During this period, *Leishmania*  
355 needs to shield itself against the harmful actions of the proteolytic enzymes [9], avoid the  
356 immune system [10, 11], escape from the peritrophic matrix [12, 13], and attach to the midgut  
357 epithelium [14]. At these early time points, most of the sand fly DE genes were down-regulated  
358 by large fold changes. Such sand fly genes are transcribed at high abundance for the most part.  
359 On day 4, multiple sand fly genes encoding digestive enzyme as well as a peritrophic matrix  
360 protein were down-regulated, pointing to parasite manipulation of the barriers imposed by the  
361 sand fly midgut in order to survive. Along the same lines, it is important to highlight that the  
362 presence of *Leishmania* in the sand fly midgut leads to the down regulation of genes potentially  
363 involved with the control of gene expression. For instance, among the sand fly transcripts down-  
364 regulated on day 2 is the transcription factor Forkhead/HNF-3, which is involved with midgut  
365 regeneration [22], and nutrient transport and absorption [23]. Accordingly, we have also  
366 observed down-regulation of sand fly amino acid and trehalose transporters on 4d after

367 *Leishmania* infection. Transcripts for metallothionein-2-like protein were also down-regulated at  
368 the same time point. The expression levels of these proteins are used as a proxy of heavy metals  
369 absorption [24]. Hence, their down-regulation in *Leishmania*-infected midguts suggests that  
370 these parasites reduce nutrient uptake by the sand fly midgut epithelium. Along the same lines,  
371 genes encoding proteins associated with metabolism of hormones, such as the juvenile hormone  
372 and ecdysone, were down-regulated on days 4 and 6. Such hormone levels change during blood  
373 digestion [25], and relevantly control the expression of sand fly midgut serine proteases [26-28],  
374 which are also down-regulated upon *Leishmania* infection on days 4 and 6. Together, these data  
375 suggest that the sand fly transcription factor Forkhead/HNF-3 as well as hormone metabolic  
376 enzymes might be key targets to control *Leishmania* infection early on.

377         As the remains of the digested blood is flushed out and the parasites detach from the  
378 epithelium [14], the parasites undergo metacyclogenesis from day 6 onwards, migrating to the  
379 anterior midgut and differentiating into infective forms [8]. At this late period in the infection,  
380 midgut barriers to *Leishmania* development are unknown or negligible. The parasites seem to  
381 multiply freely secreting a massive amount of carbohydrates (fPPG) that jams the blood intake  
382 and allows the parasites to be regurgitated into the skin [29, 30]. Most of the sand fly DE genes  
383 late in infection (day 8 onwards) were up-regulated by narrow fold change differences in  
384 response to *Leishmania*. Such genes are transcribed at high abundance for the most part. Most of  
385 these genes encode proteins that participate in detoxification of xenobiotics (cytochrome P450)  
386 and metabolism of lipids. At these time points, it seems plausible that the massive amount of  
387 parasites, reaching 120,000 cells on average on day 14 [21], might be indirectly modulating sand  
388 fly gene expression by the release of cell membranes and metabolites from dead parasites and  
389 *Leishmania*-derived exosomes [31] throughout metacyclogenesis. Interestingly, the presence of

390 *Leishmania* is undetected by the midgut immune system of the sand fly during this period. This  
391 also noted at early time points with the exception of day 4 where the down-regulation of a gene  
392 encoding attacin, an antimicrobial peptide [32], was observed. The lack of *Leishmania* detection  
393 by the immune system may constitute another adaptation of *Le. infantum* to survive in *Lu.*  
394 *longipalpis* midguts.

395

## 396 **Conclusion**

397 Overall, the presence of *Le. infantum* in the midgut of its natural vector has direct and  
398 indirect effects on sand fly midgut gene expression. On one hand, these parasites appear to  
399 manipulate gene expression early on to weaken developmental barriers imposed by the midgut.  
400 On the other hand, *Leishmania* behaves like a commensal later in the infection, and changes in  
401 the sand fly gene expression by the parasites seem to be an indirect consequence of the massive  
402 amount of the parasites inside the anterior portion of the midgut.

403

404

405

406

## 407 **Methods**

### 408 ***Leishmania* parasites, parasite load assessment, sand fly blood feeding and infection, and** 409 **midgut dissection and storage**

410 Sand fly infection and *Leishmania* counts were performed as described in our companion  
411 manuscript [21]. As controls, *Lu. longipalpis* sand flies were also fed on uninfected heparinized  
412 dog blood at the same time. After feeding, fully fed females were sorted and given 30% sucrose

413 solution *ad libitum*. Sand flies from both groups were dissected with fine needles and tweezers  
414 on a glass slide at days one, two, four, six, eight, twelve, and fourteen after blood feeding on  
415 RNase Free PBS (1X). Forty to sixty midguts were quickly rinsed in fresh RNase Free PBS  
416 (1X) and stored in RNAlater (Ambion), following manufacturer's recommendation.

417

#### 418 **RNA extraction and quality control**

419 Total RNA was extracted using the PureLink RNA Mini Kit (Life Technologies,  
420 Carlsbad), following the manufacturer's recommendations, as described in the companion  
421 manuscript [21].

422 RNA amounts and purification were assessed using a Nanodrop spectrophotometer (Nano  
423 Drop Technologies Inc, Wilmington; ND-1000), and quality control was further evaluated using  
424 a Bioanalyzer (Agilent Technologies Inc, Santa Clara, CA; 2100 Bioanalyzer), using the Agilent  
425 RNA 6000 Nano kit (Agilent Technologies) and following the manufacturer's recommendations.  
426 Only one out of the forty-two samples displayed RIN (RNA integrity number) value lower than 7  
427 (Replicate 3 - 14d Pi – RIN 6.7).

428

#### 429 **RNA-Seq library preparation and deep sequencing**

430 The RNA-Seq libraries were prepared using the NEBNext® Ultra™ RNA Library  
431 Prep Kit for Illumina (New England Biolabs, Ipswich MA), following manufacture's  
432 recommendation, for Single Ended sequencing by HiSeq 2500 (Illumina, San Diego, CA) of  
433 125 nucleotides reads (SE - 125). The RNA-Seq library preparation and sequencing was  
434 performed at the NC State University Genomic Science Laboratory.

435

## 436 **Bioinformatic pipeline and de novo assembly**

437 RNA-seq data trimming and mapping were describe elsewhere [21]. *De novo*  
438 assembly from high quality reads were a result of both Abyss (kmers from 21 to 91 in 10-  
439 fold increments) and Trinity (V2.1.1) assemblers. The combined fasta files were further  
440 assembled using an iterative blast and CAP3 pipeline as previously described [33]. Coding  
441 sequences were extracted based in the predicted longer open reading frame or the presence  
442 of a signal peptide and by similarities to other proteins found in the Refseq invertebrate  
443 database from the National Center for Biotechnology Information (NCBI), proteins from  
444 Dipterans deposited at NCBI's Genbank and from SwissProt. Automated annotation of  
445 proteins was based on a vocabulary of nearly 350 words found in matches to various  
446 databases, including Swissprot, Gene Ontology, KOG, Pfam, Drosophila mRNA transcripts,  
447 Virus, and SMART, Refseq-invertebrates and the Diptera subset of the GenBank sequences  
448 obtained by querying diptera [organism] and retrieving all protein sequences. Raw reads  
449 were deposited on the Sequence Read Archive (SRA) of the National Center for  
450 Biotechnology Information (NCBI). This Transcriptome Shotgun Assembly project has been  
451 deposited at DDBJ/EMBL/GenBank and will be available when the paper is accepted. Novel  
452 Coding sequences and putative protein sequences were submitted to the NCBI from  
453 accession numbers and will be available when the paper is accepted.

454 Raw reads were mapped to the generated dataset using the RNA-Seq by Expectation  
455 Maximization (RSEM) vs 1.3.0, Bowtie vs 2-2.2.5 and samtools vs 1.2[34]. Differential  
456 expression among timepoints and conditions were analyzed using the R suite by the  
457 Bioconductor package DeSeq2 vs 3.8 [35]. Filtering on all mapped gene counts was  
458 performed to exclude genes where the sum of counts in all the conditions was inferior to 10

459 counts. Default parameters were used with DESeq2 including the shrinks log<sub>2</sub> fold-change  
460 (FC) estimated for each tested comparison [35, 36]. A log<sub>2</sub> Fold Change and its standard  
461 error were generated in addition to a P-value (p-value) and a P-adj (Adjusted p-value) to  
462 account for the false discovery rate. Significant associations were considered when a P-adj  
463 was smaller than 5% (p < 0.05) and log<sub>2</sub> fold change larger than 0.5 (+/-).

464

### 465 **Data and statistical analyses**

466 Bubble plots and principal component analyses (PCA) were performed using the PAST3  
467 software [37]. For the later, either the log<sub>2</sub> TPMs or log<sub>2</sub> fold change (LFC) were used. Statistical  
468 analyses were carried out with Prism 7 (GraphPad Software Inc; all the other tests). Venn  
469 diagram results were obtained with Venny 2.1 (<http://bioinfogp.cnb.csic.es/tools/venny/>), and  
470 heatmaps/cluster analyses were obtained using the ClustVis tool ([38];  
471 <https://biit.cs.ut.ee/clustvis/>). Gene heatmap and volcano plots were obtained with the packages  
472 gplots and ggplot2 and constructed with the R software.

473

### 474 **nCounter XT gene expression assessment**

475 Gene expression validation was carried out using the nCounter probe-based hybridization  
476 assay (NanoString Technologies Inc, Seattle, WA), following the manufacturer's  
477 recommendation. Forty-two sand fly genes were randomly chosen (Additional file 6: Table S3)  
478 for probe design and hybridized against 100 ng of each RNA sample, resulting in three biological  
479 replications per time point. Raw output data were analyzed using the nSolver software  
480 (NanoString Technologies), normalizing the results against the counts for all 42 genes. Only  
481 genes detected by the nCounter were considered for comparisons to RNA-Seq data. For a gene to

482 be considered nCounter-detected [39], the average counts for the experimental gene had to be  
483 significantly higher than the average counts of eight negative control by Mann Whitney U test ( $p$   
484  $< 0.05$ ) in at least one of the treatments (infected or uninfected). The expression of the detected  
485 genes in each time point was used for expression comparisons with the RNA-Seq expression  
486 results for the correspondent genes. For these comparisons, only genes displaying average TPM  
487 of at least 1 in one of the treatments were considered. Fold change correlations were determined  
488 by plotting the  $\log_2$  ratio of the infected over the uninfected expression values for RNA-Seq  
489 (TPMs) and nCounter (normalized counts) and calculating the linear regression coefficient.

490

## 491 **Declarations**

492

### 493 **Ethics approval and consent to participate**

494 Not applicable

495

### 496 **Consent for publication**

497 Not applicable

498

### 499 **Availability of data and material**

500 The datasets used and/or analysed during the current study available from the corresponding  
501 author on reasonable request.

502

### 503 **Competing interest**

504 The authors declare that they have no competing interests.



505

## 506 **Funding**

507           This research was supported by the Intramural Research Program of the NIH, National  
508 Institute of Allergy and Infectious Diseases.

509

## 510 **Author Contribution**

511           I.V.C.A. and T.D.S. designed and performed the experiments. F.O. supervised  
512 bioinformatic analysis. I.V.C.A analyzed the data. C.M. performed sand fly insectary work.  
513 J.G.V., S.K. and F.O. were involved in the design, interpretation and supervision of this study.  
514 I.V.C.A wrote the first draft of the manuscript. J.G.V., S.K. and F.O edited the manuscript.

515

## 516 **Acknowledgement**

517           We are also thankful to T.R. Wilson and B.G. Bonilla from LMVR, NIAID for sand fly  
518 insectary support.

519

## 520 **Abbreviations**

521 **Forkhead/HNF-3** : Hepatocyte nuclear factor 3/fork head

522 **TPM**: Transcripts per million

523 **PBM**: Post blood meal

524 **Pi**: Post infection

525 **fPPG**: Filamentous proteophosphoglycan

526 **DE**: Differentially expressed

527 **PCA:** Principal component analysis  
528 **LFC:** Log 2 fold change  
529 **ORF:** Open reading frame  
530 **GO:** Gene ontology  
531 **SRA:** Sequence Read Archive  
532 **NCBI:** National Center for Biotechnology Information  
533 **PBS:** Phosphate buffer saline

534

## 535 **References**

- 536 1. Bates PA: **Revising *Leishmania's* life cycle.** *Nat Microbiol* 2018, **3**(5):529-530.
- 537 2. Lawyer PG, Ngumbi PM, Anjili CO, Odongo SO, Mebrahtu YB, Githure JI, Koech DK,  
538 Roberts CR: **Development of *Leishmania major* in *Phlebotomus duboscqi* and**  
539 ***Sergentomyia schwetzi* (Diptera: Psychodidae).** *Am J Trop Med Hyg* 1990, **43**(1):31-  
540 43.
- 541 3. Walters LL: ***Leishmania* differentiation in natural and unnatural sand fly hosts.** *J*  
542 *Eukaryot Microbiol* 1993, **40**(2):196-206.
- 543 4. Walters LL, Modi GB, Chaplin GL, Tesh RB: **Ultrastructural development of**  
544 ***Leishmania chagasi* in its vector, *Lutzomyia longipalpis* (Diptera: Psychodidae).** *Am*  
545 *J Trop Med Hyg* 1989, **41**(3):295-317.
- 546 5. Pimenta PF, Modi GB, Pereira ST, Shahabuddin M, Sacks DL: **A novel role for the**  
547 **peritrophic matrix in protecting *Leishmania* from the hydrolytic activities of the**  
548 **sand fly midgut.** *Parasitology* 1997, **115** ( Pt 4):359-369.
- 549 6. Pimenta PF, Turco SJ, McConville MJ, Lawyer PG, Perkins PV, Sacks DL: **Stage-**  
550 **specific adhesion of *Leishmania* promastigotes to the sandfly midgut.** *Science* 1992,  
551 **256**(5065):1812-1815.
- 552 7. Pimenta PF, Saraiva EM, Rowton E, Modi GB, Garraway LA, Beverley SM, Turco SJ,  
553 Sacks DL: **Evidence that the vectorial competence of phlebotomine sand flies for**  
554 **different species of *Leishmania* is controlled by structural polymorphisms in the**  
555 **surface lipophosphoglycan.** *Proc Natl Acad Sci U S A* 1994, **91**(19):9155-9159.
- 556 8. Serafim TD, Coutinho-Abreu IV, Oliveira F, Meneses C, Kamhawi S, Valenzuela JG:  
557 **Sequential blood meals promote *Leishmania* replication and reverse**  
558 **metacyclogenesis augmenting vector infectivity.** *Nat Microbiol* 2018, **3**(5):548-555.
- 559 9. Sant'anna MR, Diaz-Albiter H, Mubarak M, Dillon RJ, Bates PA: **Inhibition of trypsin**  
560 **expression in *Lutzomyia longipalpis* using RNAi enhances the survival of**  
561 ***Leishmania*.** *Parasit Vectors* 2009, **2**(1):62.
- 562 10. Telleria EL, Sant'Anna MR, Ortigao-Farias JR, Pitaluga AN, Dillon VM, Bates PA,  
563 Traub-Cseko YM, Dillon RJ: **Caspar-like gene depletion reduces *Leishmania***

- 564 **infection in sand fly host *Lutzomyia longipalpis*. *J Biol Chem* 2012, **287**(16):12985-**  
565 **12993.**
- 566 11. Di-Blasi T, Telleria EL, Marques C, Couto RM, da Silva-Neves M, Jancarova M, Volf P,  
567 Tempone AJ, Traub-Cseko YM: ***Lutzomyia longipalpis* TGF-beta Has a Role in**  
568 ***Leishmania infantum* chagasi Survival in the Vector. *Front Cell Infect Microbiol***  
569 **2019, **9**:71.**
- 570 12. Coutinho-Abreu IV, Sharma NK, Robles-Murguia M, Ramalho-Ortigao M: **Targeting**  
571 **the midgut secreted PpChit1 reduces *Leishmania major* development in its natural**  
572 **vector, the sand fly *Phlebotomus papatasi*. *PLoS Negl Trop Dis* 2010, **4**(11):e901.**
- 573 13. Coutinho-Abreu IV, Sharma NK, Robles-Murguia M, Ramalho-Ortigao M:  
574 **Characterization of *Phlebotomus papatasi* peritrophins, and the role of PpPer1 in**  
575 ***Leishmania major* survival in its natural vector. *PLoS Negl Trop Dis* 2013,**  
576 **7(3):e2132.**
- 577 14. Kamhawi S, Ramalho-Ortigao M, Pham VM, Kumar S, Lawyer PG, Turco SJ, Barillas-  
578 Mury C, Sacks DL, Valenzuela JG: **A role for insect galectins in parasite survival. *Cell***  
579 **2004, **119**(3):329-341.**
- 580 15. Pimenta PF, Saraiva EM, Sacks DL: **The comparative fine structure and surface**  
581 **glycoconjugate expression of three life stages of *Leishmania major*. *Exp Parasitol***  
582 **1991, **72**(2):191-204.**
- 583 16. Soares RP, Macedo ME, Ropert C, Gontijo NF, Almeida IC, Gazzinelli RT, Pimenta PF,  
584 Turco SJ: ***Leishmania chagasi*: lipophosphoglycan characterization and binding to**  
585 **the midgut of the sand fly vector *Lutzomyia longipalpis*. *Mol Biochem Parasitol* 2002,**  
586 **121(2):213-224.**
- 587 17. Kelly PH, Bahr SM, Serafim TD, Ajami NJ, Petrosino JF, Meneses C, Kirby JR,  
588 Valenzuela JG, Kamhawi S, Wilson ME: **The Gut Microbiome of the Vector**  
589 ***Lutzomyia longipalpis* Is Essential for Survival of *Leishmania infantum*. *MBio* 2017,**  
590 **8(1).**
- 591 18. Dostalova A, Votypka J, Favreau AJ, Barbian KD, Volf P, Valenzuela JG, Jochim RC:  
592 **The midgut transcriptome of *Phlebotomus (Larrousius) perniciosus*, a vector of**  
593 ***Leishmania infantum*: comparison of sugar fed and blood fed sand flies. *BMC***  
594 ***Genomics* 2011, **12**:223.**
- 595 19. Jochim RC, Teixeira CR, Laughinghouse A, Mu J, Oliveira F, Gomes RB, Elnaiem DE,  
596 Valenzuela JG: **The midgut transcriptome of *Lutzomyia longipalpis*: comparative**  
597 **analysis of cDNA libraries from sugar-fed, blood-fed, post-digested and *Leishmania***  
598 ***infantum chagasi*-infected sand flies. *BMC Genomics* 2008, **9**:15.**
- 599 20. Ramalho-Ortigao M, Jochim RC, Anderson JM, Lawyer PG, Pham VM, Kamhawi S,  
600 Valenzuela JG: **Exploring the midgut transcriptome of *Phlebotomus papatasi*:**  
601 **comparative analysis of expression profiles of sugar-fed, blood-fed and *Leishmania-***  
602 ***major*-infected sandflies. *BMC Genomics* 2007, **8**:300.**
- 603 21. Coutinho-Abreu IV, Serafim TD, Meneses C, Kamhawi S, Oliveira F, Valenzuela JG:  
604 **Distinct gene expression patterns in vector-residing *Leishmania infantum* identify**  
605 **parasite stage-enriched markers *BioRxiv* 2019, **679712**.**
- 606 22. Lan Q, Cao M, Kollipara RK, Rosa JB, Kittler R, Jiang H: **FoxA transcription factor**  
607 **Fork head maintains the intestinal stem/progenitor cell identities in *Drosophila*. *Dev***  
608 ***Biol* 2018, **433**(2):324-343.**

- 609 23. Bolukbasi E, Khericha M, Regan JC, Ivanov DK, Adcott J, Dyson MC, Nespital T,  
610 Thornton JM, Alic N, Partridge L: **Intestinal Fork Head Regulates Nutrient**  
611 **Absorption and Promotes Longevity.** *Cell Rep* 2017, **21**(3):641-653.
- 612 24. Qin Q, Wang X, Zhou B: **Functional studies of Drosophila zinc transporters reveal**  
613 **the mechanism for dietary zinc absorption and regulation.** *BMC Biol* 2013, **11**:101.
- 614 25. Shapiro AB, Wheelock GD, Hagedorn HH, Baker FC, Tsai TW, Schooley DA: **Juvenile**  
615 **hormone and juvenile hormone esterase in adult females of the mosquito Aedes**  
616 **aegypti.** *Journal of Insect Physiology* 1986, **32**(10):867-877.
- 617 26. Lucas KJ, Zhao B, Roy S, Gervaise AL, Raikhel AS: **Mosquito-specific microRNA-**  
618 **1890 targets the juvenile hormone-regulated serine protease JHA15 in the female**  
619 **mosquito gut.** *RNA Biol* 2015, **12**(12):1383-1390.
- 620 27. Bian G, Raikhel AS, Zhu J: **Characterization of a juvenile hormone-regulated**  
621 **chymotrypsin-like serine protease gene in Aedes aegypti mosquito.** *Insect Biochem*  
622 *Mol Biol* 2008, **38**(2):190-200.
- 623 28. Zhao B, Kokoza VA, Saha TT, Wang S, Roy S, Raikhel AS: **Regulation of the gut-**  
624 **specific carboxypeptidase: a study using the binary Gal4/UAS system in the**  
625 **mosquito Aedes aegypti.** *Insect Biochem Mol Biol* 2014, **54**:1-10.
- 626 29. Rogers ME, Chance ML, Bates PA: **The role of promastigote secretory gel in the**  
627 **origin and transmission of the infective stage of Leishmania mexicana by the sandfly**  
628 **Lutzomyia longipalpis.** *Parasitology* 2002, **124**(Pt 5):495-507.
- 629 30. Rogers ME, Corware K, Muller I, Bates PA: **Leishmania infantum**  
630 **proteophosphoglycans regurgitated by the bite of its natural sand fly vector,**  
631 **Lutzomyia longipalpis, promote parasite establishment in mouse skin and skin-**  
632 **distant tissues.** *Microbes Infect* 2010, **12**(11):875-879.
- 633 31. Atayde VD, Aslan H, Townsend S, Hassani K, Kamhawi S, Olivier M: **Exosome**  
634 **Secretion by the Parasitic Protozoan Leishmania within the Sand Fly Midgut.** *Cell*  
635 *Rep* 2015, **13**(5):957-967.
- 636 32. Hultmark D, Engstrom A, Andersson K, Steiner H, Bennich H, Boman HG: **Insect**  
637 **immunity. Attacins, a family of antibacterial proteins from Hyalophora cecropia.**  
638 *EMBO J* 1983, **2**(4):571-576.
- 639 33. Karim S, Singh P, Ribeiro JM: **A deep insight into the sialotranscriptome of the gulf**  
640 **coast tick, Amblyomma maculatum.** *PLoS One* 2011, **6**(12):e28525.
- 641 34. Li B, Dewey CN: **RSEM: accurate transcript quantification from RNA-Seq data**  
642 **with or without a reference genome.** *BMC Bioinformatics* 2011, **12**:323.
- 643 35. Love MI, Huber W, Anders S: **Moderated estimation of fold change and dispersion**  
644 **for RNA-seq data with DESeq2.** *Genome Biol* 2014, **15**(12):550.
- 645 36. Zhu A, Ibrahim JG, Love MI: **Heavy-tailed prior distributions for sequence count**  
646 **data: removing the noise and preserving large differences.** *Bioinformatics* 2019,  
647 **35**(12):2084-2092.
- 648 37. Hammer O, Harper DAT, Ryan PD: **PAST: Paleontological statistics software package**  
649 **for education and data analysis.** *Palaeontologia Electronica* 2001, **4**(1):1-9.
- 650 38. Metsalu T, Vilo J: **ClustVis: a web tool for visualizing clustering of multivariate data**  
651 **using Principal Component Analysis and heatmap.** *Nucleic Acids Res* 2015,  
652 **43**(W1):W566-570.

653 39. Geiss GK, Bumgarner RE, Birditt B, Dahl T, Dowidar N, Dunaway DL, Fell HP, Ferree  
654 S, George RD, Grogan T *et al*: **Direct multiplexed measurement of gene expression**  
655 **with color-coded probe pairs**. *Nat Biotechnol* 2008, **26**(3):317-325.  
656

657

658

## 659 **Figure Legends**

660 **Figure 1** Overview of the transcriptome repertoire displaying the overall percentage of contigs  
661 (% of contigs) or abundance (%TPM) for all time points. The distribution of the mapped reads to  
662 the functional classification are highlighted.

663

664 **Figure 2** Midgut sequencing overall analysis. **A.** Principal component analysis (PCA) describing  
665 the position of each midgut time point on the expression space. Expression space was generated  
666 based on the  $\log_2$  of TPMs using the 10,000 most highly expressed transcripts across libraries.  
667 The Eigenvalues and % variance for PC1 and PC3 % were 6221.99 and 77.19% and 330.34 and  
668 4.1%, respectively. **B-H.** Gene expression validation by nCounter (Nanostring). Linear  
669 regression analyses comparing the expression profiles of randomly chosen transcripts obtained  
670 with RNA-Seq and nCounter (Nanostring) techniques for the seven time points. All comparisons  
671 were statistically significant ( $p < 0.0001$ ).  $R^2$ : regression coefficient. n: number of transcripts.  
672 The color codes labeling each time point were as follow: B. Aqua (1d); C. Royal Blue (2d); D.  
673 Sea Green (4d); E. Sandy Brown (6d); F. Saddle Brown (8d); G. Red (12d); and H. Fuchsia  
674 (14d).

675

676 **Figure 3** Analysis of differentially expressed (DE) midgut transcripts across time points. **A.**

677 Total number of differentially expressed transcripts across time points. **B.** Number of DE

678 transcripts up- and down-regulated in *Leishmania* infected over uninfected midguts at each time  
679 point. **C.** Left: Venn diagrams depicting the number of DE transcripts unique and shared  
680 amongst the time points 1d through 6d. Right: Venn diagrams depicting the number (and  
681 percentages) of DE transcripts unique and shared amongst time points 6d through 14d. **D.** PC  
682 analysis of all the DE transcripts in all time points based on the  $\log_2$  fold change (LFC) of the  
683 *Leishmania*-infected over the uninfected TPM values for each transcript. Each quadrant in the  
684 expression space was labelled from 1<sup>st</sup> to 4<sup>th</sup> and the transcripts mapped to the respective  
685 quadrants were color coded in Spring Green (1<sup>st</sup>), Dodge Blue (2<sup>nd</sup>), Blue Violet (3<sup>rd</sup>), and Red  
686 (4<sup>th</sup>). The Eigenvalues and % variance for PC1 and PC2 % were 163.59 and 76.28% and 40.6  
687 and 18.94%, respectively. **E.** Expression analysis per quadrant. The average TPM across time  
688 points for every DE transcript mapped onto each quadrant was plotted. Horizontal bars indicate  
689 median values and differences were statistically significant (\* Mann Whitney U test,  $p < 0.0001$ ).  
690 Color coding as in D. **F.** Expression analysis per quadrant per time point in blood fed libraries  
691 (PBM). The average TPM for each time point for every DE transcript mapped in each quadrant  
692 was plotted. Mean TPM as shapes and SEM bars are depicted. Based on the differences observed  
693 in E and F, the quadrants in D were labeled to describe the DE transcripts expressed in high and  
694 low abundance (as defined by PC1) and expressed early and late (as defined by PC2). DE was  
695 considered significant for transcripts displaying LFC either lower than -1 or higher than 1 and  
696 FDR q-value lower than 0.05.

697

698 **Figure 4** Up-regulated transcripts in *Leishmania*-infected midguts at each time point mapped  
699 onto the expression space. **A.** Bubble plot depicts all the DE transcripts mapped onto the  
700 expression space. Doughnut chart shows the proportion of transcripts in each quadrant. Inset on

701 the right depicts the scale for the LFC of each up-regulated transcript represented by the diameter  
702 of each bubble. **B-H.** Bubble plots mapping the up-regulated transcripts in the expression space  
703 for each of the seven time points. The doughnut chart in each graph shows the proportion of up-  
704 regulated genes per quadrant (inner circle) and the proportion of all DE genes per quadrant (outer  
705 circle), as in A. Differences were statistically significant at  $p < 0.05$  (Chi-square test). DE was  
706 considered significant for transcripts displaying LFC higher than 1 and FDR q-value lower than  
707 0.05.

708

709 **Figure 5** *Leishmania* down-regulated transcripts in each time point mapped on the expression  
710 space. **A.** Bubble plot depicts all the DE transcripts mapped onto the expression space. Doughnut  
711 chart shows the proportion of transcripts in each quadrant. Inset on the right depicts the scale for  
712 the LFC of each down-regulated transcript represented by the diameter of each bubble. **B-F.**  
713 Bubble plots mapping the down-regulated transcripts onto the expression space for each of all  
714 time points, except days 6 and 8 that were devoid of down-regulated transcripts. The doughnut  
715 chart in each graph shows the proportion of down-regulated genes per quadrant (inner circle) and  
716 the proportion of all DE genes per quadrant (as in a). Differences were statistically significant at  
717  $p < 0.05$  (Chi-square test). DE was considered significant for transcripts displaying LFC either  
718 lower than -1 and FDR q-value lower than 0.05.

719

720 **Figure 6** DE transcripts sorted by molecular functions. **A and C.** Pie charts displaying the  
721 proportion of midgut DE genes up-regulated (A) and down-regulated (C) by *Leishmania*  
722 infection, belonging to different functional groups. **B and D.** Heatmaps and cluster analyses  
723 depicting differences in the number of DE genes up-regulated (B) and down-regulated (D) by

724 *Leishmania* infection belonging to different groups of molecular function. Pie chart legends: Cs:  
725 cytoskeleton; Detox: oxidative metabolism/detoxification; Extmat: extracellular matrix; Imm:  
726 immunity; Met: metabolism; Ne: nuclear export; Nr: nuclear regulation; Pe: protein export; Pm:  
727 protein modification; Prot: proteasome machinery; Ps: protein synthesis machinery; S: secreted  
728 protein; St: signal transduction; Storage: storage protein; Te: transposable element; Tf:  
729 transcription factor; Tm: transcription machinery; Tr: transporters and channels; Uk: unknown  
730 protein. The heatmaps are color-coded according to the legends on the right. DE was considered  
731 significant for transcripts displaying LFC either lower than -1 or higher than 1 and FDR q-value  
732 lower than 0.05.

733

734 **Figure 7** DE transcripts belonging to the molecular function “oxidative  
735 metabolism/detoxification” across time points. **A and C.** Pie charts displaying the proportion of  
736 midgut DE genes up-regulated (A) and down-regulated (C) by *Leishmania* infection, belonging  
737 to the different sorts of oxidative metabolism/detoxification molecular function. **B and D.**  
738 Heatmaps and cluster analyses depicting differences in the number of DE genes up-regulated (B)  
739 and down-regulated (D) by *Leishmania* infection, belonging to different sorts of oxidative  
740 metabolism/detoxification molecular function. Pie chart legends: Dehyd: dehydrogenase; Glutat:  
741 glutathione s-transferase; P450: cytochrome P450; Oxidase: oxidase/peroxidase; Reduc:  
742 reductase; Abc: Transporter ABC superfamily; Thio: thioredoxin binding protein; Transf:  
743 sulfotransferase. The heatmaps are color-coded according to the legends on the right. DE was  
744 considered significant for transcripts displaying LFC either lower than -1 or higher than 1 and  
745 FDR q-value lower than 0.05.

746



747 **Figure 8** DE transcripts belonging to the molecular function “metabolism” across time points. **A**  
748 **and C.** Pie charts displaying the proportion of midgut DE genes up-regulated (A) and down-  
749 regulated (C) by *Leishmania* infection, belonging to the different sorts of metabolism molecular  
750 function. **B and D.** Heatmaps and cluster analyses depicting differences in the number of DE  
751 genes up-regulated (B) and down-regulated (D) by *Leishmania* infection belonging to different  
752 sorts of metabolism molecular function, respectively. Pie chart legends: Aa: amino acid  
753 metabolism; Carb: carbohydrate metabolism; Energy: energy production; Int: intermediate  
754 metabolism; Lipd: lipid metabolism; Nuc: nucleotide metabolism. The heatmaps are color-coded  
755 according to the legends on the right. DE was considered significant for transcripts displaying  
756 LFC either lower than -1 or higher than 1 and FDR q-value lower than 0.05.

757

758 **Figure 9** DE transcripts belonging to the molecular function “secreted protein” across time  
759 points. **A and C.** Pie charts displaying the proportion of *Leishmania* up-regulated (A) and down-  
760 regulated (C) transcripts belonging to the different sorts of secreted protein molecular function.  
761 Legends: S: other; Metal: metalloprotease; Lipoc: lipocalin; Met-li: lipase; Met-nu: nuclease;  
762 Mucin; Protea: protease; Protin: protease inhibitor; Uk: unknown protein. **B and D.** Heatmaps  
763 and cluster analyses depicting differences in the number of DE genes up-regulated (B) and  
764 down-regulated (D) belonging to different sorts of secreted protein molecular function. The  
765 heatmaps are color-coded according to the legends on the right. DE was considered significant  
766 for transcripts displaying LFC either lower than -1 or higher than 1 and FDR q-value lower than  
767 0.05.

768

769 **Table Legends**

770 **Table 1** Selected midgut transcripts differentially regulated upon *Leishmania* infection.

771

772 **Table 2** Top eight up-regulated midgut transcripts upon *Leishmania* infection per time point.

773 Legends: Detox: oxidative metabolism/detoxification; Imm: immunity; Met: metabolism; Pe:

774 protein export; Pm: protein modification; Prot: proteosome machinery; Tr: transporters and

775 channels; Glutat: glutathione s-transferase; Oxidase: oxidase/peroxidase; Aa: amino acid

776 metabolism; Carb: carbohydrate metabolism; Lipd: lipid metabolism; Nuc: nucleotide

777 metabolism. S/: other; Uk: unknown protein. LFC: log<sub>2</sub> Fold Change.

778

779 **Table 3** Top five down- regulated midgut transcripts upon *Leishmania* infection per time point.

780 Legends: Detox: oxidative metabolism/detoxification; Nr: nuclear regulation; Pm: protein

781 modification; S: secreted protein; St: signal transduction; Storage: storage protein; Tf:

782 transcription factor; Tm: transcription machinery; Tr: transporters and channels; Uk: unknown

783 protein. Met/Carb: carbohydrate metabolism; Met/Lipd: lipid metabolism; Met/Nuc: nucleotide

784 metabolism. S/: other; Protea: protease; Protinh: protease inhibitor. LFC: log<sub>2</sub> Fold Change.

785

## 786 **Additional Files**

787 Additional file 1:

788 **Figure S1** Heatmap displaying the expression profiles and cluster analyses of the midgut

789 transcripts across seven time points in uninfected and *Leishmania*-infected samples. The 10,000

790 most highly expressed transcripts are depicted.

791

792 Additional file 2:

793 **Table S1** Transcriptional and bioinformatics description of the *Lu. longipalpis* midgut  
794 transcripts.

795

796 Additional file 3:

797 **Table S2** Summary of the overall percentage of contigs (% of contigs) or abundance (%TPM)  
798 for all time points. The distribution of the mapped reads to the functional classification are  
799 highlighted.

800

801

802

803 Additional file 4:

804 **Figure S2** Pie chart depicting the overall proportion of transcripts belonging to the same  
805 molecular function group. Cs: cytoskeleton; Detox: oxidative metabolism/detoxification; Extmat:  
806 extracellular matrix; Imm: immunity; Met: metabolism; Ne: nuclear export; Nr: nuclear  
807 regulation; Pe: protein export; Pm: protein modification; Prot: proteosome machinery; Ps:  
808 protein synthesis machinery; S: secreted protein; St: signal transduction; Storage: storage  
809 protein; Te: transposable element; Tf: transcription factor; Tm: transcription machinery; Tr:  
810 transporters and channels; Uk: unknown protein.

811

812 Additional file 5:

813 **Table S3** Principal component analysis output for comparisons between average transcriptional  
814 expression amongst time points as well as for individual replicates.

815

816 Additional file 6:

817 **Figure S3** Principal component analysis (PCA) describing the position of each replicate for each  
818 midgut time point in the expression space. (A) Expression space was generated based on the log<sub>2</sub>  
819 of TPMs using the 10,000 most expressed transcripts across libraries. The Eigenvalues and %  
820 variance for PC1 and PC3 were 5632.97 and 60% and 321.15 and 3.4%, respectively. (B)  
821 Expression space between PC1 and PC2. The Eigenvalues and % variance for PC2 were 670.05  
822 and 7.1%, respectively. The color codes labeling each time point were as follow: B. Aqua (1d);  
823 C. Royal Blue (2d); D. Sea Green (4d); E. Sandy Brown (6d); F. Saddle Brown (8d); G. Red  
824 (12d); and H. Fuchsia (14d).

825

826 Additional file 7:

827 **Table S4** nCounter probes, counts, and expression comparisons with RNA-Seq TPMs.

828

829 Additional file 8:

830 **Table S5** Gene sets displaying differential gene expression at each time point.

831

832 Additional file 9:

833 **Figure S4** Volcano plots depicting the differentially expressed (DE) transcripts at each time  
834 point. (A-G). DE transcripts at 1d, 2d, 4d, 6d, 8d, 12d, and 14d, respectively. Only transcripts  
835 exhibiting q-values lower than 0.05 are shown. Transcripts displaying fold change greater or  
836 lower than 2 ( $-1 < \text{LFC} > 1$ ) are color coded, as follow: Aqua (1d); Royal Blue (2d); Sea Green  
837 (4d); Sandy Brown (6d); Saddle Brown (8d); Red (12d); and Fuchsia (14d). LFC scale is color  
838 coded in gray (top right). In black, transcripts not significant at  $-1 < \text{LFC} > 1$ .

839

840 Additional file 10:

841 **Table S6** Genes uniquely differentially expressed at each time point.

842

843 Additional file 11:

844 **Table S7** Gene sets mapping on each quadrant of the PCA map.

845

846 Additional file 12:

847 **Figure S5** Expression analysis per quadrant per time point in infected libraries (Pi). The average

848 TPM for each time point for every DE transcript mapped in each quadrant was plotted. Mean

849 TPM as shapes and SEM bars are depicted.

850

851 Additional file 13:

852 **Table S8** Sets of up-regulated genes mapping on each quadrant of the PCA map at each time

853 point.

854

855 Additional file 14:

856 **Table S9** Sets of down-regulated genes mapping on each quadrant of the PCA map at each time

857 point.

858

859 Additional file 15:

860 **Table S10** Functional analyses of differentially expressed genes.

861

862 Additional file 16:

863 **Table S11** Gene Ontology (GO) enrichment for the up-regulated genes at each time point.

864

865 Additional file 17:

866 **Table S12** Gene Ontology (GO) enrichment for the down-regulated genes at each time point.

867

868

869

870 **Table 2** Top eight up-regulated midgut transcripts upon *Leishmania* infection per time point.

| Time Point | Quadrant   | Class    | Transcript name   | Best match                                                | E-value                                           | LFC      |       |
|------------|------------|----------|-------------------|-----------------------------------------------------------|---------------------------------------------------|----------|-------|
| <b>1d</b>  | 2nd        | tr       | lulogutSigP-46620 | Permease of the major facilitator superfamily             | 9.00E-85                                          | 6.036    |       |
| <b>2d</b>  | 2nd        | pe       | lulogut42669      | Endosomal membrane EMP70 - 10 predicted membrane helices  | 0                                                 | 6.449    |       |
|            | 2nd        | met/aa   | lulogut42063      | Glutamate decarboxylase                                   | 0                                                 | 2.361    |       |
|            | 2nd        | prot     | lulogut44776      | E3 ubiquitin-protein ligase listerin-like                 | 0                                                 | 1.508    |       |
| <b>4d</b>  | 4th        | imm      | lulogutSigP-25698 | Major epididymal secretory protein HE1 - signalP detected | 3.00E-12                                          | 2.443    |       |
|            | 4th        | s/       | lulogutSigP-646   | Insect allergen related repeat - signalP detected         | 5.00E-28                                          | 2.306    |       |
|            | 4th        | s/       | lulogutSigP-16736 | Insect allergen related repeat - signalP detected         | 4.00E-30                                          | 2.223    |       |
|            | 4th        | s/       | lulogutSigP-13949 | Insect allergen related repeat - signalP detected         | 2.00E-42                                          | 2.164    |       |
|            | 1st        | s/       | lulogutSigP-32546 | Secreted metalloprotease                                  | 0                                                 | 2.021    |       |
|            | 4th        | met/carb | lulogut24944      | Alpha-L-fucosidase - signalP detected                     | 0                                                 | 1.843    |       |
|            | 4th        | s/       | lulogutSigP-13652 | Insect allergen related repeat - signalP detected         | 2.00E-32                                          | 1.779    |       |
|            | 3rd        | met/aa   | lulogutSigP-33280 | Puromycin-sensitive aminopeptidase - signalP detected     | 0                                                 | 1.761    |       |
|            | <b>6d</b>  | 4th      | s/                | lulogutSigP-54492                                         | Insect allergen related repeat - signalP detected | 5.00E-42 | 2.445 |
|            |            | 1st      | s/                | lulogutSigP-53922                                         | Secreted metalloprotease                          | 0        | 2.404 |
| 1st        |            | s/       | lulogutSigP-32546 | Secreted metalloprotease                                  | 7.00E-29                                          | 2.312    |       |
| 4th        |            | pm       | lulogutSigP-35736 | Trypsin-like serine protease - signalP detected           | 0                                                 | 2.177    |       |
| 1st        |            | pm       | lulogut24040      | Peptide methionine sulfoxide reductase                    | 2.00E-58                                          | 2.102    |       |
| 4th        |            | pm       | lulogutSigP-1870  | Trypsin-like serine protease - signalP detected           | 5.00E-67                                          | 1.842    |       |
| 4th        |            | detox    | lulogut45589      | JAV13729.1 glutathione s-transferase                      | 0                                                 | 1.836    |       |
| 4th        |            | s/       | lulogutSigP-13652 | Insect allergen related repeat - signalP detected         | 2.00E-32                                          | 1.759    |       |
| <b>8d</b>  |            | 4th      | pm                | lulogutSigP-35736                                         | Trypsin-like serine protease - signalP detected   | 2.00E-58 | 1.719 |
|            | 3rd        | met/aa   | lulogutSigP-39956 | Puromycin-sensitive aminopeptidase - signalP detected     | 0                                                 | 1.642    |       |
|            | 4th        | detox/ox | lulogut46050      | XP_001843663.1 cytochrome P450 4C1                        | 0                                                 | 1.484    |       |
|            | 1st        | detox/ox | lulogut36308      | probable cytochrome P450 6a14                             | 0                                                 | 1.368    |       |
|            | 4th        | met/lipd | lulogut34584      | XP_001651935.1 epoxide hydrolase 1                        | 5.00E-92                                          | 1.363    |       |
|            | 4th        | detox    | lulogut45588      | JAV13724.1 glutathione s-transferase-like protein         | 3.00E-77                                          | 1.353    |       |
|            | 1st        | detox/ox | lulogutSigP-48117 | probable cytochrome P450 6a14                             | 0                                                 | 1.173    |       |
|            | 1st        | detox/ox | lulogut15028      | XP_001870174.1 cytochrome P450 6a8                        | 0                                                 | 1.145    |       |
|            | <b>12d</b> | 4th      | detox/ox          | lulogut32543                                              | XP_001870174.1 cytochrome P450 6a8                | 0        | 1.592 |

|            |     |          |                   |                                                            |          |       |
|------------|-----|----------|-------------------|------------------------------------------------------------|----------|-------|
|            | 4th | met/nuc  | lulogut42037      | JAV11176.1 alkaline nuclease partial                       | 0        | 1.307 |
|            | 4th | met/lipd | lulogut50375      | Long chain fatty acid acyl-CoA ligase                      | 4.00E-52 | 1.252 |
|            | 1st | detox    | lulogut33084      | Cytochrome P450 CYP3/CYP5/CYP6/CYP9 subfamilies            | 0        | 1.221 |
|            | 2nd | pe       | lulogutSigP-54446 | Peptide exporter ABC superfamily                           | 3.00E-59 | 1.189 |
|            | 1st | detox/ox | lulogutSigP-8474  | probable cytochrome P450 6a14                              | 0        | 1.171 |
|            | 1st | detox    | lulogutSigP-34911 | Cytochrome P450 CYP3/CYP5/CYP6/CYP9 subfamilies            | 1.00E-59 | 1.107 |
|            | 1st | detox/ox | lulogut237        | XP_001649312.1 probable cytochrome P450 6d5                | 1.00E-68 | 1.093 |
| <b>14d</b> | 3rd | met/carb | lulogut56076      | JAV12467.1 udp-glucuronosyl and udp-glucosyl transferase   | 0        | 2.140 |
|            | 3rd | detox    | lulogut13235      | ABV44726.1 glutathione S-transferase-like protein          | 2.00E-88 | 1.692 |
|            | 1st | detox/ox | lulogutSigP-8474  | probable cytochrome P450 6a14                              | 0        | 1.359 |
|            | 4th | met/lipd | lulogut34584      | XP_001651935.1 epoxide hydrolase 1                         | 5.00E-92 | 1.258 |
|            | 4th | detox/ox | lulogut32543      | XP_001870174.1 cytochrome P450 6a8                         | 0        | 1.239 |
|            | 3rd | met/lipd | lulogutSigP-34488 | Acyl-CoA synthetase - probable fragment - signalP detected | 7.00E-83 | 1.217 |
|            | 2nd | met/carb | lulogutSigP-34624 | JAV12537.1 udp-glucuronosyl and udp-glucosyl transferase   | 0        | 1.181 |
|            | 1st | detox/ox | lulogut237        | XP_001649312.1 probable cytochrome P450 6d5                | 1.00E-68 | 1.174 |

871 Legends: Detox: oxidative metabolism/detoxification; Imm: immunity; Met: metabolism; Pe:  
872 protein export; Pm: protein modification; Prot: proteosome machinery; Tr: transporters and  
873 channels; Glutat: glutathione s-transferase; Oxidase: oxidase/peroxidase; Aa: amino acid  
874 metabolism; Carb: carbohydrate metabolism; Lipd: lipid metabolism; Nuc: nucleotide  
875 metabolism. S/: other; Uk: unknown protein. LFC: log<sub>2</sub> Fold Change.

876

877

878 **Table 3** Top five down- regulated midgut transcripts upon *Leishmania* infection per time point.

| Time Point | Quadrant | Class      | Transcript name   | Best match                                                                  | E-value  | LFC     |
|------------|----------|------------|-------------------|-----------------------------------------------------------------------------|----------|---------|
| <b>1d</b>  | 2nd      | nr         | lulogut42801      | DNA damage-responsive repressor GIS1/RPH1 jumonji superfamily               | 0        | -1.419  |
| <b>2d</b>  | 4th      | st         | lulogut40195      | NP_523758.3 juvenile hormone esterase isoform A                             | 6.00E-29 | -1.823  |
|            | 2nd      | tr         | lulogutSigP-32510 | Permease of the major facilitator superfamily                               | 0        | -1.9194 |
|            | 2nd      | tr         | lulogutSigP-46620 | Permease of the major facilitator superfamily                               | 9.00E-85 | -2.538  |
|            | 2nd      | tf         | lulogut44569      | Forkhead/HNF-3-related transcription factor                                 | 3.00E-90 | -2.960  |
|            | 3rd      | tr         | lulogut21743      | JAV05033.1 sodium/potassium-transporting atpase subunit beta-2-like protein | 0        | -2.991  |
|            | 3rd      | st         | lulogutSigP-22907 | Acetylcholinesterase/Butyrylcholinesterase                                  | 4.00E-54 | -5.397  |
|            | 3rd      | s/met/lipd | lulogutSigP-23161 | AAO22149.1 mammalian-like lipase                                            | 0        | -5.688  |
|            | 3rd      | uk         | lulogutSigP-18032 | Unknown product                                                             | NA       | -5.917  |
| <b>4d</b>  | 1st      | s/uk       | lulogutSigP-14897 | hypothetical secreted protein precursor                                     | 1000     | -3.861  |
|            | 3rd      | met/lipd   | lulogut21836      | JAV11771.1 lipid storage droplet surface-binding protein 1                  | 0        | -3.861  |
|            | 3rd      | s/met/nuc  | lulogutSigP-26492 | JAV11299.1 deoxyribonuclease i partial                                      | 0        | -4.105  |
|            | 2nd      | s/protin   | lulogutSigP-16416 | BPTI/Kunitz family of serine protease inhibitors                            | 8.00E-17 | -4.125  |
|            | 2nd      | met/carb   | lulogut25316      | Hexokinase                                                                  | 0        | -4.299  |
|            | 2nd      | s/uk       | lulogutSigP-16502 | hypothetical conserved secreted protein precursor                           | NA       | -4.926  |

|            |     |             |                   |                                                                             |          |        |
|------------|-----|-------------|-------------------|-----------------------------------------------------------------------------|----------|--------|
|            | 3rd | s/uk        | lulogut36242      | hypothetical secreted protein precursor                                     | 1000     | -5.523 |
|            | 3rd | s/          | lulogutSigP-24104 | JAV08889.1 juvenile hormone binding protein in insects                      | 0        | -8.423 |
| <b>12d</b> | 1st | detox       | lulogut19743      | JAV03807.1 metallothionein-2-like protein                                   | 2.00E-34 | -2.909 |
|            | 2nd | storage     | lulogut21324      | JAV06440.1 ovotransferrin partial                                           | 0        | -3.778 |
|            | 1st | s/uk        | lulogutSigP-16502 | hypothetical conserved secreted protein precursor                           | NA       | -3.893 |
|            | 2nd | s/protinh   | lulogutSigP-16416 | BPTI/Kunitz family of serine protease inhibitors - signalP detected         | 8.00E-17 | -3.902 |
|            | 2nd | tm          | lulogutSigP-15657 | nucleolar and coiled-body phosphoprotein 1 isoform X2 Drosophila fucusphila | 4.00E-21 | -4.086 |
|            | 2nd | pm/protease | lulogut25198      | JAV08757.1 trypsin                                                          | 0        | -4.383 |
|            | 2nd | s/          | lulogutSigP-24035 | JAV08413.1 secreted mucin                                                   | 0        | -4.536 |
|            | 2nd | met/lipd    | lulogut41307      | JAV11511.1 ecdysteroid kinase                                               | 0        | -6.148 |
| <b>14d</b> | 2nd | met/nuc     | lulogut40330      | Uridylate kinase/adenylate kinase                                           | 4E-59    | -1.292 |

879 Legends: Detox: oxidative metabolism/detoxificationNr: nuclear regulation; Pm: protein  
880 modification; S: secreted protein; St: signal transduction; Storage: storage protein; Tf:  
881 transcription factor; Tm: transcription machinery; Tr: transporters and channels; Uk: unknown  
882 protein. Met/Carb: carbohydrate metabolism; Met/Lipd: lipid metabolism; Met/Nuc: nucleotide  
883 metabolism. S/: other; Protea: protease; Protinh: protease inhibitor. LFC: log<sub>2</sub> Fold Change.

884

885

886

887

888

889

890

891
